## SUBJECT INDEX TO VOLUME 104

Entries from JOURNAL departments are identified as follows: Case Reports—(CR); Classic Papers Revisited—(CPR); Clinical Investigations—(CI); Clinical Concepts and Commentary—(CCC); Correspondence—(CO); Economics—(EC); Editorial Views—(EV); Educational Material—(EM); Journal Symposium—(JS); Laboratory Investigations—(LI); Laboratory Reports—(LR); Pain and Regional Anesthesia—(PRA); Practical Guidelines—(PG); Report of Scientific Meeting—(RSM); Review Article—(RA); Special Article—(SA); Special Section—(SS); Web Site—(WS).

### A

#### Abdominal surgery

- analgesic treatment after laparoscopic cholecystectomy (RA) [Bisgaard], 835
- hypercapnia increases subcutaneous and colonic oxygen tension during (CI) [Fleischmann et al.], 944
- intraoperative fluid restriction and intraabdominal surgery outcome (CO) [Beach], 889

#### Acetylcholine and acetylcholine receptors

- activation and inhibition of nicotinic acetylcholine receptors by succinylcholine (LI) [Jonsson et al.], 724
- excitatory and inhibitory actions of isoflurane on cholinergic ascending arousal system of rat (LI) [Dong et al.], 122
- orexins increase cortical acetylcholine release and EEG activation through orexin-1 receptor in rat basal forebrain during isoflurane anesthesia (LI) [Dong et al.], 1023
- succinylcholine: new insights into mechanism of action (EV) [Martyn et al.], 633

#### Acid-base balance

- Gennari, Adroque, Galla, Madias, *Acid-Base Disorders and Their Treatment* (EM) [Story et al.], 1357

#### Acute respiratory distress syndrome

- endotracheal tubes: conduit for oral and nasal microbial communities to lungs (EV) [Jacobs et al.], 224
- ventilator-associated pneumonia leading to acute lung injury after trauma (CI) [Stéphan et al.], 235

#### Adrenergic agents and receptors

- $\beta_2$ -adrenoceptor genotype and hypotension after spinal anesthesia for cesarean delivery (SOAP special session) [Smiley et al.], 644
- halothane effect on  $\beta_2$ -adrenergic receptor- $G_{\alpha_s}$  heterotrimeric G protein coupling (LI) [Hayashi et al.], 754

#### Age and aging

- age-dependent responses to nerve injury-induced mechanical allodynia (PRA) [Ririe et al.], 344
- isoflurane neuroprotection in rat hippocampal slices decreases with aging (LI) [Zhan et al.], 995

#### Airway management

- airway management in adults after cervical spine trauma (RA) [Crosby], 1293
- comparison of three disposable extraglottic airway devices in spontaneously breathing adults (CI) [van Zundert et al.], 1165
- differences between midazolam and propofol sedation on upper airway collapsibility using dynamic negative airway pressure (CI) [Norton et al.], 1155
- difficulties in advancing an endotracheal tube over a fiberoptic bronchoscope (CO) [Asai], 377
- endotracheal tubes: conduit for oral and nasal microbial communities to lungs (EV) [Jacobs et al.], 224
- facilitating endotracheal tube advancement during fiberscope-assisted intubation (CO) [Ho et al.], 376
- fiberoptic intubation (CO) [Schwartz et al.], 377
- how to improve success with endotracheal tube passage during fiberoptic intubation (CO) [Wheeler et al.], 378
- lidocaine lollipop for awake fiberoptic bronchoscopy (CO) [Ayoub et al.], 1352
- lightwand tracheal intubation with and without muscle relaxation (CI) [Massó et al.], 249
- markedly displaced arytenoid cartilage during fiberoptic orotracheal intubation (CO) [Aoyama et al.], 378
- obesity and difficult intubation (CO) [Collins et al.], 617
- plastic single-use and metal reusable laryngoscope blades for orotra-

cheal intubation during rapid sequence induction (CI) [Amour et al.], 60

- predicting difficult intubation (CO) [Rincón], 618
- short thyromental distance a predictor of difficult intubation or an indicator for small blade selection? (CI) [Tripathi et al.], 1131
- solutions to nasogastric tube-*ProSeal LMA*<sup>®</sup> conundrum (CO) [Brimacombe et al.], 620
- two techniques for retrograde tracheal intubation in human fresh cadavers (CI) [Lenfant et al.], 48
- unforeseen esophageal misplacement of airway exchange catheter leading to gastric perforation (CO) [Fetterman et al.], 1111
- valve leaks in new disposable extraglottic airway devices (CO) [Akça], 615

#### Albumin

- botulinum toxin type A therapy and human serum albumin (CO) [Tumber et al.], 1108
- contrasting effects of colloid and crystalloid resuscitation fluids on cardiac vascular permeability (LI) [Jacob et al.], 1223
- isoflurane increases transendothelial albumin permeability in isolated rat lung (LI) [Hu et al.], 777

#### American Society of Anesthesiologists (ASA)

- practice advisory for intraoperative awareness and brain function monitoring (SA) [ASA Task Force on Intraoperative Awareness], 847
- practice advisory for perioperative visual loss associated with spine surgery (SA) [ASA Task Force on Perioperative Blindness], 1319
- practice guidelines for the perioperative management of patients with obstructive sleep apnea (SA) [ASA Task Force of Perioperative Management of Patients with Obstructive Sleep Apnea], 1081
- statistical indiscretions in papers from the ASA Closed Claims Project (CO) [Orkin], 615

#### $\gamma$ -Aminobutyric acid

- additive effects of sevoflurane and propofol on  $\gamma$ -aminobutyric acid receptor function (LI) [Sebel et al.], 1176

#### Amyloid $\beta$ protein

- isoflurane induces apoptosis and increases amyloid  $\beta$  protein levels (LI) [Xie et al.], 988

#### Anandamide

- effects of general anesthesia on blood levels of (CI) [Schelling et al.], 273

#### Anaphylactic shock

- arginine vasopressin, terlipressin, or epinephrine for hypotension in rat model of (LI) [Dewachter et al.], 734

#### Anatomy

- corniculate cartilages are wrongly labeled arytenoid cartilages (CO) [Benumof], 377
- investing layer of cervical fascia of neck may not exist (CO) [Pandit et al.], 1344
- markedly displaced arytenoid cartilage during fiberoptic orotracheal intubation (CO) [Aoyama et al.], 378

#### Anemia

- fresh *vs.* aged stored blood to reverse anemia-induced brain oxygenation deficits (CI) [Weiskopf et al.], 911

#### Anesthesia machines and circuits

- another cause for ventilator failure (CO) [Ortega et al.], 1351
- Datex-Ohmeda M-NMT Module: potentially confusing user interface (CO) [Kopman], 1109
- safe, low-technology anesthesia system for medical missions to remote locations (CO) [Khambatta et al.], 1354
- vaporizer-selection malfunction in Dräger Narkomed 2C machine (CO) [Kee et al.], 890

**Anesthesia management**

- impact on severe morbidity and mortality (CO) [Bilen-Rosas et al.], 204
- injury and liability associated with monitored anesthesia care (CI) [Bhananker et al.], 228
- MAC should stand for maximum anesthesia caution, not minimal anesthesia care (EV) [Hug], 221
- perioperative mortality and (CO) [Avram et al.], 202

**Anesthesia mechanisms**

- anesthesia *in silico* (EV) [Sceniak et al.], 400

**Anesthesiologists**

- academic highway buzzing, but clinicians in crisis (CO) [Kurosu], 1345
- anesthesiology physician scientists in academic medicine (SA) [Schwinn et al.], 170
- anesthesiology residency programs for physician scientists (EV) [Knight et al.], 1
- Ansel Marion Caine, M.D. (EV) [Bacon], 1122
- Ansel Marion Caine, M.D. (SA) [Broussard et al.], 1329
- Canton, McGoldrick, *Careers in Anesthesiology: Autobiographical Memoirs Volume VIII. A. A. Spence, Julien F. Biebuyck, Richard J. Kitz, John W. Severinghaus* (EM) [Curry], 389
- devices for lung isolation used by anesthesiologists with limited thoracic experience (CI) [Campos et al.], 261
- package inserts are a must read for anesthesiologists (CO) [Sosis], 1106
- patient simulator performance as adjunct to oral examination for senior anesthesia residents (CI) [Savoldelli et al.], 475
- who better than anesthesiologists? 44th Rovenstine Lecture (SA) [Warner], 1094

**Anesthesiology**

- instructions for obtaining journal CME credit, 219, 395, 627, 903, 1117, 1359
- journal-sponsored activities at the 2006 annual meeting, 226

**Aneurysmal subarachnoid hemorrhage**

- changing outcome from (EV) [Warner et al.], 629
- prognostic value of plasma S100B protein levels after (CI) [Weiss et al.], 658

**Animal studies. See Models and modeling****Antibiotics**

- erythromycin induces tolerance against transient global cerebral ischemia in rats (pharmacologic preconditioning) (LI) [Brambrink et al.], 1208

**Anxiety**

- perioperative treatment of patients with history of intraoperative awareness and post-traumatic stress disorder (CO) [Mashour et al.], 893

**Aorta**

- influence of descending thoracic aortic cross clamping on BIS value and plasma propofol concentration (CI) [Kakinohana et al.], 939

**Apnea**

- practice guidelines for the perioperative management of patients with obstructive sleep apnea (SA) [ASA Task Force of Perioperative Management of Patients with Obstructive Sleep Apnea], 1081
- transcutaneous CO<sub>2</sub> partial pressure monitoring during apnea testing in brain-dead patients (CI) [Vivien et al.], 701

**Apoptosis**

- isoflurane induces apoptosis and increases amyloid  $\beta$  protein levels (LI) [Xie et al.], 988

**Aprotinin**

- fatal thrombosis after mitral valve replacement for endocarditis: aprotinin and disseminated intravascular coagulation (CO) [Augoustides et al.], 213

**Arginine vasopressin**

- compared with terlipressin or epinephrine for hypotension in rat model of anaphylaxis (LI) [Dewachter et al.], 734

**Arrhythmias**

- droperidol has been reported to cause serious arrhythmias (CO) [Sosis], 386

**Arytenoid cartilage**

- corniculate cartilages wrongly labeled as (CO) [Benumof], 377

- markedly displaced, during fiberoptic orotracheal intubation (CO) [Aoyama et al.], 378

**Aspiration**

- statistical prediction of type of gastric aspiration lung injury based on early cytokine/chemokine profiles (LI) [Hutson et al.], 73

**Atlantoaxial subluxation**

- intraoperative head positions in rheumatoid arthritis and (CI) [Tokunaga et al.], 675

**Auditory stimuli**

- cortical processing during propofol anesthesia (CI) [Plourde et al.], 448

**Author corrections, 393, 901****Awareness, intraoperative**

- inpatient reproducibility of BISxp<sup>®</sup> monitor (CI) [Niedhart et al.], 242
- perioperative treatment of patients with history of post-traumatic stress disorder and (CO) [Mashour et al.], 893
- practice advisory for intraoperative awareness and brain function monitoring (SA) [ASA Task Force on Intraoperative Awareness], 847

**B****Benzodiazepines**

- actions of midazolam on excitatory transmission in dorsal horn neurons of adult rat spinal cord (PRA) [Kohno et al.], 338
- differences between midazolam and propofol sedation on upper airway collapsibility using dynamic negative airway pressure (CI) [Norton et al.], 1155
- lorazepam as independent risk factor for transitioning to delirium in ICU patients (CI) [Pandharipande et al.], 21

**Bispectral Index<sup>®</sup> Monitoring System (BIS)**

- closed-loop vs. manual titration of propofol guided by (CI) [Liu et al.], 686
- influence of descending thoracic aortic cross clamping on BIS value and plasma propofol concentration (CI) [Kakinohana et al.], 939
- inpatient reproducibility of BISxp<sup>®</sup> monitor (CI) [Niedhart et al.], 242
- time delay of index calculation: Cerebral State, Bispectral, and Narcotrend<sup>®</sup> indices (LI) [Pilge et al.], 488
- unusual event with (CO) [Hachwa et al.], 619

**Blindness**

- practice advisory for perioperative visual loss associated with spine surgery (SA) [ASA Task Force on Perioperative Blindness], 1319

**Blood coagulation and anticoagulation**

- bring rapidly degradable hydroxyethyl starch to the United States (CO) [Tang et al.], 1105
- cerebral rebleeding by spinal anesthesia in patient with undiagnosed chronic subdural hematoma (CR) [Zeidan et al.], 613
- changing outcome from aneurysmal subarachnoid hemorrhage (EV) [Warner et al.], 629
- deep vein thrombosis after recombinant Factor VIIa infusion (CO) [Pépin et al.], 892
- intracranial subdural hematomas and cerebral herniation after labor epidural with no evidence of dural puncture (CR) [Mashour et al.], 610
- prognostic value of plasma S100B protein levels after subarachnoid aneurysmal hemorrhage (CI) [Weiss et al.], 658

**Blood flow**

- blood warming during hemofiltration can improve hemodynamics and outcome in ovine septic shock (LI) [Rogiers et al.], 1216
- cerebral blood flow affects dose requirements of intracarotid propofol for electrocerebral silence (LI) [Joshi et al.], 290

**Blood pressure**

- $\beta_2$ -adrenoceptor genotype and hypotension after spinal anesthesia for cesarean delivery (SOAP special session) [Smiley et al.], 644
- arginine vasopressin, terlipressin, or epinephrine for hypotension in rat model of anaphylaxis (LI) [Dewachter et al.], 734
- heart rate and prophylaxis of hypotension after subarachnoid block for cesarean delivery (SOAP special session) [Hans et al.], 635

heart rate variability predicts severe hypotension after spinal anesthesia (PRA) [Hanss et al.], 537

#### Blood transfusion

fresh *vs.* aged stored blood to reverse anemia-induced brain oxygenation deficits (CI) [Weiskopf et al.], 911

impact of postoperative unwashed shed blood retrieved after total knee arthroplasty on endotoxin-stimulated TNF- $\alpha$  release in vitro (CI) [Muñoz et al.], 267

physiologic transfusion triggers (EV) [Spahn et al.], 905

#### Botulinum toxin type A

botulinum toxin type A therapy and human serum albumin (CO) [Tumber et al.], 1108

#### Brachial plexus

shoulder restraints as a potential cause for stretch neuropathies: biomechanical support for the impact of shoulder girdle depression and arm abduction on nerve strain (CO) [Coppiters], 1351

simultaneous bilateral infraclavicular brachial plexus blocks with low-dose lidocaine using ultrasound guidance (CR) [Sandhu et al.], 199

#### Brain function and disease

cerebral blood flow affects dose requirements of intracarotid propofol for electrocerebral silence (LD) [Joshi et al.], 290

cerebral rebleeding by spinal anesthesia in patient with undiagnosed chronic subdural hematoma (CR) [Zeidan et al.], 613

changing outcome from aneurysmal subarachnoid hemorrhage (EV) [Warner et al.], 629

cortical processing of complex auditory stimuli during propofol anesthesia (CI) [Plourde et al.], 448

erythromycin induces tolerance against transient global cerebral ischemia in rats (pharmacologic preconditioning) (LD) [Brambrink et al.], 1208

excitatory and inhibitory actions of isoflurane on cholinergic ascending arousal system of rat (LD) [Dong et al.], 122

fresh *vs.* aged stored blood to reverse anemia-induced brain oxygenation deficits (CI) [Weiskopf et al.], 911

general anesthetic-induced seizures explained by mean-field model of cortical dynamics (SA) [Wilson et al.], 588

intracranial hypotension: spontaneous arachnoid rupture in a parturient (CR) [Albertin et al.], 609

intracranial subdural hematomas and cerebral herniation after labor epidural with no evidence of dural puncture (CR) [Mashour et al.], 610

isoflurane neuroprotection in rat hippocampal slices decreases with aging (LD) [Zhan et al.], 995

neuroprotective effects of propofol in models of cerebral ischemia (LD) [Adembri et al.], 80

orexins increase cortical acetylcholine release and EEG activation through orexin-1 receptor in rat basal forebrain during isoflurane anesthesia (LD) [Dong et al.], 1023

practice advisory for intraoperative awareness and brain function monitoring (SA) [ASA Task Force on Intraoperative Awareness], 847

prognostic value of plasma S100B protein levels after subarachnoid aneurysmal hemorrhage (CI) [Weiss et al.], 658

spontaneous arachnoid rupture in a parturient (CR) [Albertin et al.], 609

transcutaneous CO<sub>2</sub> partial pressure monitoring during apnea testing in brain-dead patients (CI) [Vivien et al.], 701

xenon during cardiopulmonary bypass and cerebral air embolism in rats (LD) [Jungwirth et al.], 770

#### Bronchoscopy

lidocaine lollipop for awake fiberoptic bronchoscopy (CO) [Ayoub et al.], 1352

#### Bupivacaine

comparative somatic and visceral antinociception and neurotoxicity of intrathecal bupivacaine, levobupivacaine, and dextropropivacaine in rats (PRA) [Muguruma et al.], 1249

efficacy of single-dose, multilevel paravertebral nerve blockade for analgesia after thoracoscopic procedures (PRA) [Hill et al.], 1047

inhibition of spinal extracellular receptor-activated kinase by (PRA) [Yanagidate et al.], 805

#### Buprenorphine

mechanism-based pharmacokinetic-pharmacodynamic modeling of the antinociceptive effect of buprenorphine in healthy volunteers (PRA) [Yassen et al.], 1232

### C

#### Caffeine

effects of caffeine, halothane, and 4-chloro-*m*-cresol on skeletal muscle lactate and pyruvate in malignant hyperthermia-susceptible and normal swine (LI) [Bina et al.], 90

#### Calcium and calcium channels

characterization of ryanodine receptor-mediated calcium release in human B cells (LD) [McKinney et al.], 1191

intravenous anesthetics inhibit capacitative calcium entry into pulmonary venous smooth muscle cells (LD) [Shimizu et al.], 791

propofol decreases myofilament Ca<sup>2+</sup> sensitivity *via* protein kinase C-, nitric oxide synthase-dependent pathway in diabetic cardiomyocytes (LD) [Wickley et al.], 978

#### Cannabinoids

effects of general anesthesia on anandamide blood levels (CI) [Schelling et al.], 273

multicenter dose-escalation study of analgesic and adverse effects of oral cannabis extract (Cannador) for postoperative pain management (PRA) [Holdcroft et al.], 1040

#### Carbon dioxide

Gravenstein, Jaffe, Paulus, *Capnography: Clinical Aspects* (EM) [Roy], 895

hypercapnia increases subcutaneous and colonic oxygen tension during abdominal surgery (CI) [Fleischmann et al.], 944

transcutaneous CO<sub>2</sub> partial pressure monitoring during apnea testing in brain-dead patients (CI) [Vivien et al.], 701

#### Cardiac arrest

is xenon really neuroprotective after cardiac arrest? (CO) [Fries et al.], 211

#### Cardiomyocytes

propofol decreases myofilament Ca<sup>2+</sup> sensitivity *via* protein kinase C-, nitric oxide synthase-dependent pathway in diabetic cardiomyocytes (LD) [Wickley et al.], 978

propofol-induced activation of protein kinase C isoforms in adult rat ventricular myocytes (LD) [Wickley et al.], 970

#### Cardiomyopathy

hypertrophic cardiomyopathy (CCC) [Poljac], 183

#### Cardioprotection

effectiveness of isoflurane in inducing delayed preconditioning against myocardial infarction *in vivo* (CO) [Xia et al.], 383

infarct-remodeling myocardium is receptive to protection by isoflurane postconditioning (LLI) [Feng et al.], 1004

produced by isoflurane after ischemia-reperfusion injury in mice (LI) [Tsutsumi et al.], 495

#### Cardiopulmonary bypass

safety of xenon delivery while on cardiopulmonary bypass for coronary artery bypass graft surgery (CI) [Lockwood et al.], 458

xenon and cerebral air embolism in rats during (LD) [Jungwirth et al.], 770

#### Cardiovascular surgery

comparison of the effect of high- and low-dose fentanyl on the incidence of postoperative cognitive dysfunction after coronary artery bypass surgery in the elderly (CI) [Silbert et al.], 1137

fatal thrombosis after mitral valve replacement for endocarditis: aprotinin and disseminated intravascular coagulation (CO) [Augoustides et al.], 213

improving identification of patients at risk of postoperative renal failure after cardiac surgery (CI) [Wijeyesundera et al.], 65

postoperative morbidity of obese diabetic patients undergoing coronary artery bypass graft surgery (CI) [Pan et al.], 441

safety of xenon delivery while on cardiopulmonary bypass for coronary artery bypass graft surgery (CI) [Lockwood et al.], 458

thoracic epidural *versus* intravenous patient-controlled analgesia after cardiac surgery (PRA) [Hansdottir et al.], 142

#### Carnitine deficiency

carnitine deficiency, mitochondrial metabolism, and abnormal response to anesthetics (CO) [Weinberg et al.], 1343

**Cerebral State Index**

time delay of index calculation: Cerebral State, Bispectral, and Narcotrend® indices (LI) [Pilge et al.], 488

**Cerebrospinal fluid**

upregulation of PGE<sub>2</sub> and interleukins in CNS and peripheral tissue during and after surgery (Symposium) [Buvanendran et al.], 403 (erratum, 900)

**Cervical spine**

airway management in adults after cervical spine trauma (RA) [Crosby], 1293  
atlantoaxial subluxation and intraoperative head positions in rheumatoid arthritis (CI) [Tokunaga et al.], 675  
preoperative occipitoatlantoaxial mobility assessment in rheumatoid arthritis (CI) [Takenaka et al.], 680

**Cesarean delivery**

β<sub>2</sub>-adrenoceptor genotype and hypotension after spinal anesthesia for (SOAP special session) [Smiley et al.], 644  
heart rate and prophylaxis of hypotension after subarachnoid block for (SOAP special session) [Hanss et al.], 635  
maternal and neonatal effects of remifentanyl at induction of general anesthesia for (CI) [Kee et al.], 14  
preoperative predictors for postcesarean section pain and analgesic requirement (Symposium) [Pan et al.], 417  
the treatment should not be worse than the disease (CO) [Beilin], 1348

**Chemokines**

statistical prediction of type of gastric aspiration lung injury based on early cytokine/chemokine profiles (LI) [Hutson et al.], 73

**Cholecystectomy**

analgesic treatment after laparoscopic cholecystectomy (RA) [Bisgaard], 835

**Clinical trials**

closed-loop *vs.* manual titration of propofol guided by Bispectral Index (CI) [Liu et al.], 686  
devices for lung isolation used by anesthesiologists with limited thoracic experience (CI) [Campos et al.], 261  
maternal and neonatal effects of remifentanyl at induction of general anesthesia for cesarean delivery (CI) [Kee et al.], 14  
reduction of verbal pain scores after anterior cruciate ligament reconstruction with 2-day continuous femoral nerve block (PRA) [Williams et al.], 315  
safety and efficacy of COX-2 inhibitors parecoxib and valdecoxib after noncardiac surgery (PRA) [Nussmeier et al.], 518  
thoracic epidural *versus* intravenous patient-controlled analgesia after cardiac surgery (PRA) [Hansdottr et al.], 142

**Clonidine**

perineural, reduces mechanical hypersensitivity and cytokine production in nerve injury (PRA) [Romero-Sandoval et al.], 351

**Cognitive deficits**

comparison of the effect of high- and low-dose fentanyl on the incidence of postoperative cognitive dysfunction after coronary artery bypass surgery in the elderly (CI) [Silbert et al.], 1137  
lorazepam as independent risk factor for transitioning to delirium in ICU patients (CI) [Pandharipande et al.], 21  
of mice and men and type II errors (CO) [Hartung], 206

**Complement**

blockade of the complement C5a receptor reduces incisional allodynia, edema, and cytokine expression (PRA) [Clark et al.], 1274

**Complications**

of different ventilation strategies in endoscopic laryngeal surgery (CI) [Jaquet et al.], 52  
fatal thrombosis after mitral valve replacement for endocarditis: aprotinin and disseminated intravascular coagulation (CO) [Augoustides et al.], 213  
general anesthetic-induced seizures explained by mean-field model of cortical dynamics (SA) [Wilson et al.], 588  
heart rate variability predicts severe hypotension after spinal anesthesia (PRA) [Hanss et al.], 537  
intracranial hypotension: spontaneous arachnoid rupture in a patient (CR) [Albertin et al.], 609  
intracranial subdural hematomas and cerebral herniation after labor

epidural with no evidence of dural puncture (CR) [Mashour et al.], 610

is a new classification of postoperative myocardial infarction justified? (CO) [Bould], 209

is low-current search a risk factor in peripheral nerve localization? (CO) [Al-Nasser], 1347

mitigation of direct neurotoxic effects of lidocaine and amitriptyline by inhibition of p38 mitogen-activated protein kinase *in vitro* and *in vivo* (PRA) [Lirk et al.], 1266

pneumothorax in the intensive care unit (CI) [de Lassence et al.], 5  
unforeseen esophageal misplacement of airway exchange catheter leading to gastric perforation (CO) [Fetterman et al.], 1111

**Continuing medical education (CME)**

Gerard W. Ostheimer "What's New in Obstetric Anesthesia" lecture (SA) [Bucklin], 865

hypertrophic cardiomyopathy (CCC) [Poliac], 183

injury and liability associated with monitored anesthesia care (CI) [Bhananker et al.], 228 (erratum, 900)

instructions for obtaining journal CME credit, 219, 395, 627, 903, 1117

levosimendan, a new inotropic and vasodilator agent (RA) [Toller et al.], 556

practice guidelines for the perioperative management of patients with obstructive sleep apnea (SA) [ASA Task Force of Perioperative Management of Patients with Obstructive Sleep Apnea], 1081

**Coronary artery bypass graft surgery**

comparison of the effect of high- and low-dose fentanyl on the incidence of postoperative cognitive dysfunction after coronary artery bypass surgery in the elderly (CI) [Silbert et al.], 1137

postoperative morbidity of obese diabetic patients undergoing (CI) [Pan et al.], 441

safety of xenon delivery while on cardiopulmonary bypass for (CI) [Lockwood et al.], 458

**Coronary circulation and myocardial ischemia**

isoflurane produces cardioprotection after ischemia-reperfusion injury in mice (LI) [Tsutsumi et al.], 495

propofol-induced activation of protein kinase C isoforms in adult rat ventricular myocytes (LI) [Wickley et al.], 970

**Corticosteroids**

exogenous lipid pneumonia: steroid therapy and lung lavage with an emulsifier (CR) [Russo et al.], 197

**Craniofacial surgery**

propofol pharmacokinetics and pharmacodynamics for depth of sedation in nonventilated infants after (CI) [Peeters et al.], 466

**Critical care**

Brent, Wallace, Burkhart, Phillips, Donovan, *Critical Care Toxicology* (EM) [DeLorme], 214

Fink, Abraham, Vincent, Kochanek, *Textbook of Critical Care, Fifth Edition* (EM) [Suter], 389

Hunter, Cook, Priebe, Struys, *The Year in Anaesthesia and Critical Care* (EM) [Easdown], 621

lorazepam as independent risk factor for transitioning to delirium in ICU patients (CI) [Pandharipande et al.], 21

pneumothorax in the intensive care unit (CI) [de Lassence et al.], 5

Society of Neurosurgical Anesthesia and Critical Care Scientific Meeting (RSM) [McClain], 898

White, Baldwin, *Legal and Ethical Aspects of Anaesthesia, Critical Care and Perioperative Medicine* (EM) [Kumar], 621

**Cyclooxygenase (COX) and cyclooxygenase inhibitors**

COX-2 induction after oral surgery does not entirely account for analgesia after selective blockade of COX-2 in perioperative period (PRA) [Fornai et al.], 152

developmental differences in spinal COX-1 expression after surgical incision (Symposium) [Ririe et al.], 426

increased expression of COX and nitric oxide isoforms, and exaggerated sensitivity to PGE<sub>2</sub>, in rat lumbar spinal cord 3 days after L5-L6 spinal nerve ligation (PRA) [O'Reilly et al.], 328

postoperative modulation of CNS PGE<sub>2</sub> by COX inhibitors after vascular surgery (Symposium) [Reuben et al.], 411

postsurgical safety of opioid-sparing COX-2 inhibitors (CO) [Babul et al.], 375

safety and efficacy of COX-2 inhibitors parecoxib and valdecoxib after noncardiac surgery (PRA) [Nussmeier et al.], 518

**Cytokines**

- blockade of the complement C5a receptor reduces incisional allodynia, edema, and cytokine expression (PRA) [Clark et al.], 1274
- perineural clonidine reduces mechanical hypersensitivity and cytokine production in nerve injury (PRA) [Romero-Sandoval et al.], 351
- statistical prediction of type of gastric aspiration lung injury based on early cytokine/chemokine profiles (LI) [Hutson et al.], 73
- upregulation of PGE<sub>2</sub> and interleukins in CNS and peripheral tissue during and after surgery (Symposium) [Buvanendran et al.], 403 (erratum, 900)

**D****Deep brain stimulation**

- propofol-induced dyskinesias controlled with dexmedetomidine during deep brain stimulation surgery (CR) [Deogaonkar et al.], 1337

**Delirium**

- lorazepam as independent risk factor for transitioning to delirium in ICU patients (CI) [Pandharipande et al.], 21

**Dentition**

- COX-2 induction after oral surgery does not entirely account for analgesia after selective blockade of COX-2 in perioperative period (PRA) [Fornai et al.], 152
- preanesthesia dental examination (CO) [Buffington et al.], 212

**Depth of anesthesia**

- inpatient reproducibility of BISxp<sup>®</sup> monitor (CI) [Niedhart et al.], 242
- propofol pharmacokinetics and pharmacodynamics for depth of sedation in nonventilated infants after major craniofacial surgery (CI) [Peeters et al.], 466

**Desflurane**

- effect of the physical properties of isoflurane, sevoflurane, and desflurane on pulmonary resistance in a laboratory lung model (LI) [Nykteri et al.], 1202

**Developing countries**

- safe, low-technology anesthesia system for medical missions to remote locations (CO) [Khambatta et al.], 1354

**Dexmedetomidine**

- facilitation of withdrawal of ventilatory support (CO) [Stemp et al.], 890
- propofol-induced dyskinesias controlled with dexmedetomidine during deep brain stimulation surgery (CR) [Deogaonkar et al.], 1337

**Dextropropofol**

- comparative somatic and visceral antinociception and neurotoxicity of intrathecal bupivacaine, levobupivacaine, and dextropropofol in rats (PRA) [Muguruma et al.], 1249

**Diabetes mellitus**

- and obesity, perioperative risk (EV) [Neligan et al.], 398
- postoperative morbidity of obese diabetic patients undergoing coronary artery bypass graft surgery (CI) [Pan et al.], 441
- propofol decreases myofilament Ca<sup>2+</sup> sensitivity *via* protein kinase C-, nitric oxide synthase-dependent pathway in diabetic cardiomyocytes (LI) [Wickley et al.], 978

**2,3-Diphosphoglycerate**

- fresh *vs.* aged stored blood to reverse anemia-induced brain oxygenation deficits (CI) [Weiskopf et al.], 911
- physiologic transfusion triggers (EV) [Spahn et al.], 905

**Disseminated intravascular coagulation**

- fatal thrombosis after mitral valve replacement for endocarditis: aprotinin and (CO) [Augoustides et al.], 213

**Droperidol**

- droperidol has been reported to cause serious arrhythmias (CO) [Sosis], 386
- drug-induced prolongation of QT interval (CO) [White et al.], 386

**Drug delivery**

- Absalom, Struys, *An Overview of TCI and TIVA* (EM) [Doufas], 895

**Drug interactions**

- additive effects of sevoflurane and propofol on  $\gamma$ -aminobutyric acid receptor function (LI) [Sebel et al.], 1176
- do general anesthetics add up? (EV) [Hemmings et al.], 1120
- interaction of propofol and sevoflurane on loss of consciousness and movement to skin incision during general anesthesia (CI) [Harris et al.], 1170
- mechanisms underlying QT interval-prolonging effects of sevoflurane and its interactions with other QT-prolonging drugs (LI) [Kang et al.], 1015
- well-being model: drug interaction model for positive and negative effects (LI) [Zanderigo et al.], 742

**Drug labeling**

- drug labels should evolve with medical knowledge (CO) [Baumgarten], 1107
- labeling (package insert): meaning by the Food and Drug Administration of not recommended, not indicated, and off-label use (CO) [Moore], 1107
- package inserts are a must read for anesthesiologists (CO) [Sosis], 1106

**Drug reactions/toxicity**

- carnitine deficiency, mitochondrial metabolism, and abnormal response to anesthetics (CO) [Weinberg et al.], 1343
- droperidol has been reported to cause serious arrhythmias (CO) [Sosis], 386
- drug-induced prolongation of QT interval (CO) [White et al.], 386
- mitigation of direct neurotoxic effects of lidocaine and amitriptyline by inhibition of p38 mitogen-activated protein kinase *in vitro* and *in vivo* (PRA) [Lirk et al.], 1266
- multicenter dose-escalation study of analgesic and adverse effects of oral cannabis extract (Cannador) for postoperative pain management (PRA) [Holdcroft et al.], 1040
- propofol-induced dyskinesias controlled with dexmedetomidine during deep brain stimulation surgery (CR) [Deogaonkar et al.], 1337

**E****Echocardiography**

- critical role of intraoperative transesophageal echocardiography for detection of extrapulmonary thromboemboli during surgical pulmonary embolectomy (CO) [Nowak et al.], 1346

**Economics**

- effect of postoperative experiences on willingness to pay to avoid postoperative pain, nausea, and vomiting (PRA) [van den Bosch et al.], 1033
- is the operating room of the future a viable economic reality? (CO) [Dritz], 1340
- predicting patient nonappearance for surgery to optimize operating room utilization (EC) [Basson et al.], 826
- value in obtaining a patient's willingness to pay for a particular anesthetic intervention (EV) [Macario et al.], 906

**Editorial views**

- anesthesiology residency programs for physician scientists (EV) [Knight et al.], 1
- Ansel Marion Caine, M.D. (EV) [Bacon], 1122
- changing outcome from aneurysmal subarachnoid hemorrhage (EV) [Warner et al.], 629
- do general anesthetics add up? (EV) [Hemmings et al.], 1120
- endotracheal tubes: conduit for oral and nasal microbial communities to lungs (EV) [Jacobs et al.], 224
- genetic basis of opioid-induced hyperalgesia (EV) [Nackley et al.], 909
- MAC should stand for maximum anesthesia caution, not minimal anesthesiology care (EV) [Hug], 221
- obesity and diabetes, perioperative risk (EV) [Neligan et al.], 398
- physiologic transfusion triggers (EV) [Spahn et al.], 905
- setting the "furnace" during anesthesia (EV) [Lindahl], 1119
- special issue on plasticity in postoperative pain (EV) [Raja et al.], 397
- succinylcholine: new insights into mechanism of action (EV) [Martyn et al.], 633
- sugammadex: revolutionary approach to neuromuscular antagonism (EV) [Kopman], 631
- value in obtaining a patient's willingness to pay for a particular anesthetic intervention (EV) [Macario et al.], 906

**Elderly patients**

comparison of the effect of high- and low-dose fentanyl on the incidence of postoperative cognitive dysfunction after coronary artery bypass surgery in the elderly (CI) [Silbert et al.], 1137

**Electrocardiogram**

drug-induced prolongation of QT interval (CO) [White et al.], 386  
QT interval measurement (CI) [Charbit et al.], 255

**Electroencephalogram (EEG)**

approximate entropy changes during remifentanyl infusion (CI) [Noh et al.], 921  
orexins increase cortical acetylcholine release and EEG activation through orexin-1 receptor in rat basal forebrain during isoflurane anesthesia (LI) [Dong et al.], 1023  
spectral entropy as measure of hypnosis in children (CI) [Klockars et al.], 708  
time delay of index calculation: Cerebral State, Bispectral, and Narcotrend<sup>®</sup> indices (LI) [Pilge et al.], 488

**Endocannabinoids**

effects of general anesthesia on anandamide blood levels (CI) [Schelling et al.], 273

**Endoscopy**

complications of different ventilation strategies in endoscopic laryngeal surgery (CI) [Jaquet et al.], 52

**Endotoxin**

increased susceptibility to ventilator-associated lung injury persists after clinical recovery from experimental endotoxemia (LI) [Schreiber et al.], 133  
ropivacaine decreases inflammation in endotoxin-induced lung injury (LI) [Blumenthal et al.], 961

**Epidural anesthesia and analgesia**

intracranial subdural hematomas and cerebral herniation after labor epidural with no evidence of dural puncture (CR) [Mashour et al.], 610  
proper priority please (CO) [Wildsmith], 1105  
thoracic epidural *versus* intravenous patient-controlled analgesia after cardiac surgery (PRA) [Hansdotir et al.], 142

**Epinephrine**

compared with arginine vasopressin or terlipressin for hypotension in rat model of anaphylaxis (LI) [Dewachter et al.], 734

**Equipment and technology**

another cause for ventilator failure (CO) [Ortega et al.], 1351  
Barash, Perrino, Reeves, Garwood, Sivarajan, *A Practical Approach to Transesophageal Echocardiography on PDA: Powered by Skyscape, Inc., CD-ROM* (EM) [Rehfeldt], 1357  
comparison of three disposable extraglottic airway devices in spontaneously breathing adults (CI) [van Zundert et al.], 1165  
copper kettle revisited (CPR) [Morris], 881  
Datex-Ohmeda M-NMT Module: potentially confusing user interface (CO) [Kopman], 1109  
devices for lung isolation used by anesthesiologists with limited thoracic experience (CI) [Campos et al.], 261  
intrapatient reproducibility of BISxp<sup>®</sup> monitor (CI) [Niedhart et al.], 242  
mucosal pressures induced by cuffs of different airway devices (CI) [Ulrich-Pur et al.], 933  
plastic single-use and metal reusable laryngoscope blades for orotracheal intubation during rapid sequence induction (CI) [Amour et al.], 60  
short thyromental distance a predictor of difficult intubation or an indicator for small blade selection? (CI) [Tripathi et al.], 1131  
unusual event with Bispectral Index<sup>®</sup> Monitoring System (CO) [Hachwa et al.], 619  
use of safety needles in anesthesia (CO) [Neustein], 1112  
valve leaks in new disposable extraglottic airway devices (CO) [Akça], 615  
vaporizer-selection malfunction in Dräger Narkomed 2C machine (CO) [Kee et al.], 890

**Errata**, 393, 625, 900**Erythrocytes**

fresh *vs.* aged stored blood to reverse anemia-induced brain oxygenation deficits (CI) [Weiskopf et al.], 911  
physiologic transfusion triggers (EV) [Spahn et al.], 905

**Erythromycin**

erythromycin induces tolerance against transient global cerebral ischemia in rats (pharmacologic preconditioning) (LI) [Brambrink et al.], 1208

**Ethical issues**

White, Baldwin, *Legal and Ethical Aspects of Anaesthesia, Critical Care and Perioperative Medicine* (EM) [Kumar], 621

**F****Fentanyl**

comparison of the effect of high- and low-dose fentanyl on the incidence of postoperative cognitive dysfunction after coronary artery bypass surgery in the elderly (CI) [Silbert et al.], 1137

**Fluids and electrolytes**

contrasting effects of colloid and crystalloid resuscitation fluids on cardiac vascular permeability (LI) [Jacob et al.], 1223  
intraoperative fluid restriction and intraabdominal surgery outcome (CO) [Beach], 889

**Fructose**

fructose administration increases intraoperative core temperature by augmenting both metabolic rate and the vasoconstriction threshold (CI) [Mizobe et al.], 1124

**G****G proteins**

halothane effect on  $\beta_2$ -adrenergic receptor- $G_{\alpha_s}$  heterotrimeric G protein coupling (LI) [Hayashi et al.], 754

**Gas exchange**

comparative effects of vaporized perfluorohexane and partial liquid ventilation in oleic acid-induced lung injury (LI) [Gama de Abreu et al.], 278  
open and closed-circuit endotracheal suctioning in acute lung injury (CI) [Lasocki et al.], 39

**Genetics**

$\beta_2$ -adrenoceptor genotype and hypotension after spinal anesthesia for cesarean delivery (SOAP special session) [Smiley et al.], 644  
differential spinal cord gene expression in rodent models of radicular and neuropathic pain (PRA) [LaCroix-Fralish et al.], 1283  
genetic analysis of opioid-induced hyperalgesia in mice (PRA) [Liang et al.], 1054  
genetic basis of opioid-induced hyperalgesia (EV) [Nackley et al.], 909  
major histocompatibility complex haplotype is associated with posttherapeutic pain in mice (PRA) [Sato-Takeda et al.], 1063  
malignant hyperthermia in Japan: mutation screening of ryanodine receptor type 1 gene coding region (CI) [Ibarra et al.], 1146  
perinatal diagnosis of malignant hyperthermia susceptibility (CO) [Girard et al.], 1353

**Glutamate and glutamate receptors**

enhanced NMDA receptor function after chronic morphine (PRA) [Zhao et al.], 815  
propofol inhibition of NMDA receptor phosphorylation (LI) [Kingston et al.], 763

**H****Haemophilus influenzae infection**

ventilator-associated pneumonia leading to acute lung injury after trauma (CI) [Stéphan et al.], 235

**Halothane**

effect on  $\beta_2$ -adrenergic receptor- $G_{\alpha_s}$  heterotrimeric G protein coupling (LI) [Hayashi et al.], 754  
effects of caffeine, halothane, and 4-chloro-*m*-cresol on skeletal muscle lactate and pyruvate in malignant hyperthermia-susceptible and normal swine (LI) [Bina et al.], 90ep;bal

**Heart function and disease**

contrasting effects of colloid and crystalloid resuscitation fluids on cardiac vascular permeability (LI) [Jacob et al.], 1223  
droperidol has been reported to cause serious arrhythmias (CO) [Sosis], 386  
drug-induced prolongation of QT interval (CO) [White et al.], 386

- effectiveness of isoflurane in inducing delayed preconditioning against myocardial infarction *in vivo* (CO) [Xia et al.], 383
- fatal thrombosis after mitral valve replacement for endocarditis: aprotinin and disseminated intravascular coagulation (CO) [Augoustides et al.], 213
- Gerard W. Ostheimer “What’s New in Obstetric Anesthesia” lecture (SA) [Bucklin], 865
- heart rate and prophylaxis of hypotension after subarachnoid block for cesarean delivery (SOAP special session) [Hanss et al.], 635
- heart rate variability predicts severe hypotension after spinal anesthesia (PRA) [Hanss et al.], 537
- hypertrophic cardiomyopathy (CCC) [Poliac], 183
- impact of *in vivo* isoflurane preconditioning on ATP-sensitive potassium channels in rat heart (LD) [Stadnicka et al.], 503
- is a new classification of postoperative myocardial infarction justified? (CO) [Bould], 209
- is xenon really neuroprotective after cardiac arrest? (CO) [Fries et al.], 211
- mechanisms underlying QT interval-prolonging effects of sevoflurane and its interactions with other QT-prolonging drugs (LD) [Kang et al.], 1015
- QT interval measurement (CI) [Charbit et al.], 255
- Heme oxygenase-1**
- hepatic, mechanism of induction by isoflurane (LI) [Hoetzel et al.], 101
- Hemofiltration**
- blood warming during hemofiltration can improve hemodynamics and outcome in ovine septic shock (LD) [Rogiers et al.], 1216
- Hemoglobin**
- hemoglobin M (Milwaukee), oxygen saturation, and pulse oximetry (CR) [Stucke et al.], 887
- History**
- the *Anlet* (SA) [Wright et al.], 179
- Ansel Marion Caine, M.D. (EV) [Bacon], 1122
- Ansel Marion Caine, M.D. (SA) [Broussard et al.], 1329
- Canton, McGoldrick, *Careers in Anesthesiology: Autobiographical Memoirs Volume VIII. A. A. Spence, Julien F. Biebuyck, Richard J. Kitz, John W. Severinghaus* (EM) [Curry], 389
- copper kettle revisited (CPR) [Morris], 881
- obstetric analgesia: the 1982 American College of Obstetricians and Gynecologists standards and the role of Robert E. Johnstone, M.D. (CO) [Johnstone], 1103
- Hospitals**
- the elephant in the operating room (CO) [Metz], 1340
- is the operating room of the future a viable economic reality? (CO) [Dritz], 1340
- predicting patient nonappearance for surgery to optimize operating room utilization (EC) [Basson et al.], 826
- Hyperalgesia**
- genetic analysis of opioid-induced hyperalgesia in mice (PRA) [Liang et al.], 1054
- opioid-induced, genetic basis (EV) [Nackley et al.], 909
- opioid-induced, in murine model of postoperative pain (PRA) [Célerier et al.], 546
- opioid-induced (RA) [Angst et al.], 570
- postoperative (CCC) [Wilder-Smith et al.], 601
- Hypercapnia**
- subcutaneous and colonic oxygen tension during abdominal surgery increased by hypercapnia (CI) [Fleischmann et al.], 944
- Hyperkalemia**
- succinylcholine-induced, in acquired pathologic states (RA) [Martyn et al.], 158
- Hypnosis**
- spectral entropy as measure of hypnosis in children (CI) [Klockars et al.], 708
- Hypotension**
- $\beta_2$ -adrenoceptor genotype and hypotension after spinal anesthesia for cesarean delivery (SOAP special session) [Smiley et al.], 644
- after subarachnoid block for cesarean delivery, prophylactic treatment (SOAP special session) [Hanss et al.], 635
- arginine vasopressin, terlipressin, or epinephrine for hypotension in rat model of anaphylaxis (LI) [Dewachter et al.], 734
- heart rate variability predicts severe hypotension after spinal anesthesia (PRA) [Hanss et al.], 537
- the treatment should not be worse than the disease (CO) [Beilin], 1348
- Hypothermia**
- effects of increasing concentrations of propofol on jugular venous bulb oxygen saturation in neurosurgical patients under normothermic and mildly hypothermic conditions (CI) [Iwata et al.], 2733
- fructose administration increases intraoperative core temperature by augmenting both metabolic rate and the vasoconstriction threshold (CI) [Mizobe et al.], 1124
- impact of hypothermia on response to neuromuscular blocking drugs (RA) [Heier et al.], 1070
- setting the “furnace” during anesthesia (EV) [Lindahl], 1119

## I

**Imaging and radiology**

- simultaneous bilateral infraclavicular brachial plexus blocks with low-dose lidocaine using ultrasound guidance (CR) [Sandhu et al.], 199
- sonographic visualization and ultrasound-guided block of third occipital nerve (PRA) [Eichenberger et al.], 303
- ultrasound examination and localization of sciatic nerve (PRA) [Chan et al.], 309
- ultrasound-guided regional anesthesia (CCC) [Gray], 368

**Immunology and inflammation**

- blockade of the complement C5a receptor reduces incisional allodynia, edema, and cytokine expression (PRA) [Clark et al.], 1274
- increased susceptibility to ventilator-associated lung injury persists after clinical recovery from experimental endotoxemia (LI) [Schreiber et al.], 133
- postoperative modulation of CNS PGE<sub>2</sub> by COX inhibitors after vascular surgery (Symposium) [Reuben et al.], 411
- ropivacaine decreases inflammation in endotoxin-induced lung injury (LI) [Blumenthal et al.], 961
- statistical prediction of type of gastric aspiration lung injury based on early cytokine/chemokine profiles (LI) [Hutson et al.], 73
- upregulation of PGE<sub>2</sub> and interleukins in CNS and peripheral tissue during and after surgery (Symposium) [Buvanendran et al.], 403 (erratum, 900)

**Incisions**

- developmental differences in spinal COX-1 expression after surgical incision (Symposium) [Ririe et al.], 426
- patch-clamp analysis of changes in properties of substantia gelatinosa neurons after surgical incision in rat (Symposium) [Kawamata et al.], 432

**Infection**

- endotracheal tubes: conduit for oral and nasal microbial communities to lungs (EV) [Jacobs et al.], 224
- ventilator-associated pneumonia leading to acute lung injury after trauma (CI) [Stéphan et al.], 235

**Inhalation anesthesia and anesthetics**

- additive effects of sevoflurane and propofol on  $\gamma$ -aminobutyric acid receptor function (LI) [Sebel et al.], 1176
- effect of the physical properties of isoflurane, sevoflurane, and desflurane on pulmonary resistance in a laboratory lung model (LI) [Nykteri et al.], 1202
- effectiveness of isoflurane in inducing delayed preconditioning against myocardial infarction *in vivo* (CO) [Xia et al.], 383
- effects of caffeine, halothane, and 4-chloro-*m*-cresol on skeletal muscle lactate and pyruvate in malignant hyperthermia-susceptible and normal swine (LI) [Bina et al.], 90
- excitatory and inhibitory actions of isoflurane on cholinergic ascending arousal system of rat (LI) [Dong et al.], 122
- expansion of gas bubbles by nitrous oxide and xenon (LI) [Benavides et al.], 299

- halothane effect on  $\beta_2$ -adrenergic receptor- $G\alpha_s$  heterotrimeric G protein coupling (LI) [Hayashi et al.], 754
- impact of *in vivo* isoflurane preconditioning on ATP-sensitive potassium channels in rat heart (LI) [Stadnicka et al.], 503
- infarct-remodeling myocardium is receptive to protection by isoflurane postconditioning (LLI) [Feng et al.], 1004
- interaction of propofol and sevoflurane on loss of consciousness and movement to skin incision during general anesthesia (CI) [Harris et al.], 1170
- isoflurane increases transendothelial albumin permeability in isolated rat lung (LI) [Hu et al.], 777
- isoflurane induces apoptosis and increases amyloid  $\beta$  protein levels (LI) [Xie et al.], 988
- isoflurane produces cardioprotection after ischemia-reperfusion injury in mice (LI) [Tsutsumi et al.], 495
- mechanism of hepatic heme oxygenase-1 induction by isoflurane (LI) [Hoetzel et al.], 101
- mechanisms underlying QT interval-prolonging effects of sevoflurane and its interactions with other QT-prolonging drugs (LI) [Kang et al.], 1015
- minimum alveolar concentration of intravenous isoflurane lipid emulsion *vs.* inhaled isoflurane in dogs (LI) [Yang et al.], 482
- orexins increase cortical acetylcholine release and EEG activation through orexin-1 receptor in rat basal forebrain during isoflurane anesthesia (LI) [Dong et al.], 1023
- propofol inhibition of NMDA receptor phosphorylation (LI) [Kingston et al.], 763
- protective effects of isoflurane pretreatment in endotoxin-induced lung injury (LI) [Reutershan et al.], 511
- Inotropic drugs**
- levosimendan, a new inotropic and vasodilator agent (RA) [Toller et al.], 556
- Intrathecal anesthesia. See Spinal anesthesia and analgesia**
- Intravenous anesthesia and anesthetics**
- additive effects of sevoflurane and propofol on  $\gamma$ -aminobutyric acid receptor function (LI) [Sebel et al.], 1176
- cerebral blood flow affects dose requirements of intracarotid propofol for electrocerebral silence (LI) [Joshi et al.], 290
- closed-loop *vs.* manual titration of propofol guided by Bispectral Index (CI) [Liu et al.], 686
- cortical processing of complex auditory stimuli during propofol anesthesia (CI) [Plourde et al.], 448
- differences between midazolam and propofol sedation on upper airway collapsibility using dynamic negative airway pressure (CI) [Norton et al.], 1155
- EEG approximate entropy changes during remifentanyl infusion (CI) [Noh et al.], 921
- effects of increasing concentrations of propofol on jugular venous bulb oxygen saturation in neurosurgical patients under normothermic and mildly hypothermic conditions (CI) [Iwata et al.], 2733
- influence of descending thoracic aortic cross clamping on BIS value and plasma propofol concentration (CI) [Kakinohana et al.], 939
- inhibition of capacitative calcium entry into pulmonary venous smooth muscle cells by (LI) [Shimizu et al.], 791
- interaction of propofol and sevoflurane on loss of consciousness and movement to skin incision during general anesthesia (CI) [Harris et al.], 1170
- minimum alveolar concentration of intravenous isoflurane lipid emulsion *vs.* inhaled isoflurane in dogs (LI) [Yang et al.], 482
- monitoring of propofol in expired alveolar gas during artificial ventilation (LI) [Grossherr et al.], 786
- neuroprotective effects of propofol in models of cerebral ischemia (LI) [Adembri et al.], 80
- pharmacokinetics of single bolus of propofol in Chinese children (CI) [ShangGuan et al.], 27
- preparation and anesthetic properties of propofol microemulsions in rats (LI) [Morey et al.], 1184
- propofol decreases myofilament  $Ca^{2+}$  sensitivity *via* protein kinase C-, nitric oxide synthase-dependent pathway in diabetic cardiomyocytes (LI) [Wickley et al.], 978
- propofol increases presynaptic inhibition of Ia afferents in spinal cord (PRA) [Baars et al.], 798
- propofol-induced activation of protein kinase C isoforms in adult rat ventricular myocytes (LI) [Wickley et al.], 970
- propofol pharmacokinetics and pharmacodynamics for depth of sedation in nonventilated infants after major craniofacial surgery (CI) [Peeters et al.], 466
- Intubation. See also Airway management**
- airway management in adults after cervical spine trauma (RA) [Crosby], 1293
- determination of endotracheal tube size in perinatal population (CI) [Fayoux et al.], 954
- difficulties in advancing an endotracheal tube over a fiberoptic bronchoscope (CO) [Asai], 377
- endotracheal tubes: conduit for oral and nasal microbial communities to lungs (EV) [Jacobs et al.], 224
- facilitating endotracheal tube advancement during fiberscope-assisted intubation (CO) [Ho et al.], 376
- fiberoptic (CO) [Schwartz et al.], 377
- how to improve success with endotracheal tube passage during fiberoptic intubation (CO) [Wheeler et al.], 378
- lightwand tracheal intubation with and without muscle relaxation (CI) [Massó et al.], 249
- markedly displaced arytenoid cartilage during fiberoptic orotracheal intubation (CO) [Aoyama et al.], 378
- mucosal pressures induced by cuffs of different airway devices (CI) [Ulrich-Pur et al.], 933
- obesity and difficult intubation (CO) [Collins et al.], 617
- plastic single-use and metal reusable laryngoscope blades for orotracheal intubation during rapid sequence induction (CI) [Amour et al.], 60
- predicting difficult intubation (CO) [Rincón], 618
- short thyromental distance a predictor of difficult intubation or an indicator for small blade selection? (CI) [Tripathi et al.], 1131
- two techniques for retrograde tracheal intubation in human fresh cadavers (CI) [Lenfant et al.], 48
- Ions and ion channels**
- characterization of ryanodine receptor-mediated calcium release in human B cells (LI) [McKinney et al.], 1191
- impact of *in vivo* isoflurane preconditioning on ATP-sensitive potassium channels in rat heart (LI) [Stadnicka et al.], 503
- intravenous anesthetics inhibit capacitative calcium entry into pulmonary venous smooth muscle cells (LI) [Shimizu et al.], 791
- propofol decreases myofilament  $Ca^{2+}$  sensitivity *via* protein kinase C-, nitric oxide synthase-dependent pathway in diabetic cardiomyocytes (LI) [Wickley et al.], 978
- succinylcholine-induced hyperkalemia in acquired pathologic states (RA) [Martyn et al.], 158
- Ischemia**
- erythromycin induces tolerance against transient global cerebral ischemia in rats (pharmacologic preconditioning) (LI) [Brambrink et al.], 1208
- myocardial (See **Coronary circulation and myocardial ischemia**)
- neuroprotective effects of propofol in models of cerebral ischemia (LI) [Adembri et al.], 80
- Isoflurane**
- cardioprotective effect after ischemia-reperfusion injury in mice (LI) [Tsutsumi et al.], 495
- effect of the physical properties of isoflurane, sevoflurane, and desflurane on pulmonary resistance in a laboratory lung model (LI) [Nyktari et al.], 1202
- effect on transendothelial albumin permeability in isolated rat lung (LI) [Hu et al.], 777
- effectiveness in inducing delayed preconditioning against myocardial infarction *in vivo* (CO) [Xia et al.], 383
- excitatory and inhibitory actions on cholinergic ascending arousal system of rat (LI) [Dong et al.], 122
- impact of *in vivo* isoflurane preconditioning on ATP-sensitive potassium channels in rat heart (LI) [Stadnicka et al.], 503
- infarct-remodeling myocardium is receptive to protection by isoflurane postconditioning (LLI) [Feng et al.], 1004
- isoflurane induces apoptosis and increases amyloid  $\beta$  protein levels (LI) [Xie et al.], 988
- mechanism of hepatic heme oxygenase-1 induction by (LI) [Hoetzel et al.], 101



minimum alveolar concentration of intravenous isoflurane lipid emulsion *vs.* inhaled isoflurane in dogs (LI) [Yang et al.], 482  
 neuroprotection in rat hippocampal slices decreases with aging (LI) [Zhan et al.], 995  
 orexins increase cortical acetylcholine release and EEG activation through orexin-1 receptor in rat basal forebrain during isoflurane anesthesia (LI) [Dong et al.], 1023  
 protective effects of isoflurane pretreatment in endotoxin-induced lung injury (LI) [Reutershan et al.], 511

## J

## Japan

academic highway buzzing, but clinicians in crisis (CO) [Kurosu], 1345  
 malignant hyperthermia in Japan: mutation screening of ryanodine receptor type 1 gene coding region (CI) [Ibarra et al.], 1146

## Joint replacement surgery

impact of postoperative unwashed shed blood retrieved after total knee arthroplasty on endotoxin-stimulated TNF- $\alpha$  release *in vitro* (CI) [Muñoz et al.], 267  
 upregulation of PGE<sub>2</sub> and interleukins in CNS and peripheral tissue during and after surgery (Symposium) [Buvanendran et al.], 403 (erratum, 900)

## K

## Ketamine

effect of ketamine and lidocaine on spontaneous and evoked pain in patients with nerve injury pain (PRA) [Gotttrup et al.], 527  
 use of ketamine to facilitate opioid withdrawal in a child (CO) [Ito et al.], 1113

## Kidney function and disease

improving identification of patients at risk of postoperative renal failure after cardiac surgery (CI) [Wijeyesundera et al.], 65

## Knee surgery

impact of postoperative unwashed shed blood retrieved after total knee arthroplasty on endotoxin-stimulated TNF- $\alpha$  release *in vitro* (CI) [Muñoz et al.], 267  
 reduction of verbal pain scores after anterior cruciate ligament reconstruction with 2-day continuous femoral nerve block (PRA) [Williams et al.], 315

## Koebner phenomenon

postoperative pruritus (CO) [Mahajan et al.], 385

## L

## Labor and delivery

$\beta_2$ -adrenoceptor genotype and hypotension after spinal anesthesia for cesarean delivery (SOAP special session) [Smiley et al.], 644  
 Gerard W. Ostheimer "What's New in Obstetric Anesthesia" lecture (SA) [Bucklin], 865  
 heart rate and prophylaxis of hypotension after subarachnoid block for cesarean delivery (SOAP special session) [Hanss et al.], 635  
 intracranial hypotension: spontaneous arachnoid rupture in a parturient (CR) [Albertin et al.], 609  
 intracranial subdural hematomas and cerebral herniation after labor epidural with no evidence of dural puncture (CR) [Mashour et al.], 610  
 maternal and neonatal effects of remifentanyl at induction of general anesthesia for cesarean delivery (CI) [Kee et al.], 14  
 obstetric analgesia: the 1982 American College of Obstetricians and Gynecologists standards and the role of Robert E. Johnstone, M.D. (CO) [Johnstone], 1103  
 parturition in the rat: physiologic pain model (PRA) [Catheline et al.], 1257  
 phenotype of uterine cervical afferents (SOAP special session) [Tong et al.], 651

preoperative predictors for postcesarean section pain and analgesic requirement (Symposium) [Pan et al.], 417  
 Society for Obstetric Anesthesia and Perinatology (RSM), B1 (April) the treatment should not be worse than the disease (CO) [Beilin], 1348

## Laparoscopy

analgesic treatment after laparoscopic cholecystectomy (RA) [Bisgaard], 835

## Laryngeal Mask Airway

comparison of three disposable extraglottic airway devices in spontaneously breathing adults (CI) [van Zundert et al.], 1165  
 mucosal pressures induced by cuffs of different airway devices (CI) [Ulrich-Pur et al.], 933  
 solutions to nasogastric tube-*ProSeal LMA*<sup>®</sup> conundrum (CO) [Bri-macombe et al.], 620

## Laryngeal surgery

complications of different ventilation strategies in endoscopic laryngeal surgery (CI) [Jaquet et al.], 52

## Laryngoscopy

airway management in adults after cervical spine trauma (RA) [Crosby], 1293  
 plastic single-use and metal reusable laryngoscope blades for orotracheal intubation during rapid sequence induction (CI) [Amour et al.], 60  
 short thyromental distance a predictor of difficult intubation or an indicator for small blade selection? (CI) [Tripathi et al.], 1131

## Legal issues

injury and liability associated with monitored anesthesia care (CI) [Bhananker et al.], 228  
 MAC should stand for maximum anesthesia caution, not minimal anesthesiology care (EV) [Hug], 221  
 statistical indiscretions in papers from the ASA Closed Claims Project (CO) [Orkin], 615  
 White, Baldwin, *Legal and Ethical Aspects of Anaesthesia, Critical Care and Perioperative Medicine* (EM) [Kumar], 621

## Levobupivacaine

comparative somatic and visceral antinociception and neurotoxicity of intrathecal bupivacaine, levobupivacaine, and dextrobupivacaine in rats (PRA) [Muguruma et al.], 1249

## Levosimendan

a new inotropic and vasodilator agent (RA) [Toller et al.], 556

## Lidocaine

effect of ketamine and lidocaine on spontaneous and evoked pain in patients with nerve injury pain (PRA) [Gotttrup et al.], 527  
 lidocaine lollipop for awake fiberoptic bronchoscopy (CO) [Ayoub et al.], 1352  
 mitigation of direct neurotoxic effects of lidocaine and amitriptyline by inhibition of p38 mitogen-activated protein kinase *in vitro* and *in vivo* (PRA) [Lirk et al.], 1266  
 simultaneous bilateral infraclavicular brachial plexus blocks with low-dose lidocaine using ultrasound guidance (CR) [Sandhu et al.], 199  
 ultralong peripheral nerve block by lidocaine:prilocaine 1:1 mixture in lipid depot formulation (LI) [Söderberg et al.], 110

## Liver function and disease

mechanism of hepatic heme oxygenase-1 induction by isoflurane (LI) [Hoetzel et al.], 101

## Local anesthesia and anesthetics

comparative somatic and visceral antinociception and neurotoxicity of intrathecal bupivacaine, levobupivacaine, and dextrobupivacaine in rats (PRA) [Muguruma et al.], 1249  
 lidocaine lollipop for awake fiberoptic bronchoscopy (CO) [Ayoub et al.], 1352  
 mitigation of direct neurotoxic effects of lidocaine and amitriptyline by inhibition of p38 mitogen-activated protein kinase *in vitro* and *in vivo* (PRA) [Lirk et al.], 1266  
 perineural infusion of local anesthetics (CCC) [Boezaart], 872  
 ropivacaine decreases inflammation in endotoxin-induced lung injury (LI) [Blumenthal et al.], 961  
 simultaneous bilateral infraclavicular brachial plexus blocks with low-dose lidocaine using ultrasound guidance (CR) [Sandhu et al.], 199  
 ultralong peripheral nerve block by lidocaine:prilocaine 1:1 mixture in lipid depot formulation (LI) [Söderberg et al.], 110

**Lorazepam**

lorazepam as independent risk factor for transitioning to delirium in ICU patients (CI) [Pandharipande et al.], 21

**Lung function and disease**

- comparative effects of vaporized perfluorohexane and partial liquid ventilation in oleic acid-induced lung injury (LI) [Gama de Abreu et al.], 278
- critical role of intraoperative transesophageal echocardiography for detection of extrapulmonary thromboemboli during surgical pulmonary embolectomy (CO) [Nowak et al.], 1346
- devices for lung isolation used by anesthesiologists with limited thoracic experience (CI) [Campos et al.], 261
- effect of the physical properties of isoflurane, sevoflurane, and desflurane on pulmonary resistance in a laboratory lung model (LI) [Nykteri et al.], 1202
- endotracheal tubes: conduit for oral and nasal microbial communities to lungs (EV) [Jacobs et al.], 224
- exogenous lipid pneumonia: steroid therapy and lung lavage with an emulsifier (CR) [Russo et al.], 197
- Gravenstein, Jaffe, Paulus, *Capnography: Clinical Aspects* (EM) [Roy], 895
- increased susceptibility to ventilator-associated lung injury persists after clinical recovery from experimental endotoxemia (LI) [Schreiber et al.], 133
- intravenous anesthetics inhibit capacitative calcium entry into pulmonary venous smooth muscle cells (LI) [Shimizu et al.], 791
- isoflurane increases transendothelial albumin permeability in isolated rat lung (LI) [Hu et al.], 777
- new equal area method to calculate physiologic, anatomical, and alveolar dead spaces (CI) [Tang et al.], 696
- open and closed-circuit endotracheal suctioning in acute lung injury (CI) [Lasocki et al.], 39
- pneumothorax in the intensive care unit (CI) [de Lassence et al.], 5
- protective effects of isoflurane pretreatment in endotoxin-induced lung injury (LI) [Reutershan et al.], 511
- ropivacaine decreases inflammation in endotoxin-induced lung injury (LI) [Blumenthal et al.], 961
- sildenafil for pulmonary hypertension in pregnancy (CO) [Lynch et al.], 382
- statistical prediction of type of gastric aspiration lung injury based on early cytokine/chemokine profiles (LI) [Hutson et al.], 73
- ventilator-associated pneumonia leading to acute lung injury after trauma (CI) [Stéphan et al.], 235

**M****Malignant hyperthermia**

- characterization of ryanodine receptor-mediated calcium release in human B cells (LI) [McKinney et al.], 1191
- effects of caffeine, halothane, and 4-chloro-*m*-cresol on skeletal muscle lactate and pyruvate in malignant hyperthermia-susceptible and normal swine (LI) [Bina et al.], 90
- malignant hyperthermia in Japan: mutation screening of ryanodine receptor type 1 gene coding region (CI) [Ibarra et al.], 1146
- perinatal diagnosis of malignant hyperthermia susceptibility (CO) [Girard et al.], 1353

**Mechanical ventilation**

- another cause for ventilator failure (CO) [Ortega et al.], 1351
- comparative effects of vaporized perfluorohexane and partial liquid ventilation in oleic acid-induced lung injury (LI) [Gama de Abreu et al.], 278
- complications of different ventilation strategies in endoscopic laryngeal surgery (CI) [Jaquet et al.], 52
- dexmedetomidine facilitates withdrawal of ventilatory support (CO) [Stemp et al.], 890
- increased susceptibility to ventilator-associated lung injury persists after clinical recovery from experimental endotoxemia (LI) [Schreiber et al.], 133
- monitoring of propofol in expired alveolar gas during (LI) [Grossherr et al.], 786

**Medical education. See also Continuing medical education**

- anesthesiology residency programs for physician scientists (EV) [Knight et al.], 1

patient simulator performance as adjunct to oral examination for senior anesthesia residents (CI) [Savoldelli et al.], 475

**Medical missions**

safe, low-technology anesthesia system for medical missions to remote locations (CO) [Khambatta et al.], 1354

**Meeting reports**

Society for Obstetric Anesthesia and Perinatology (RSM), B1 (April)  
Society of Neurosurgical Anesthesia and Critical Care Scientific Meeting (RSM) [McClain], 898

**Methemoglobinemia**

hemoglobin M (Milwaukee), oxygen saturation, and pulse oximetry (CR) [Stucke et al.], 887

**Microdialysis**

effects of caffeine, halothane, and 4-chloro-*m*-cresol on skeletal muscle lactate and pyruvate in malignant hyperthermia-susceptible and normal swine (LI) [Bina et al.], 90

**Midazolam**

actions on excitatory transmission in dorsal horn neurons of adult rat spinal cord (PRA) [Kohno et al.], 338

differences between midazolam and propofol sedation on upper airway collapsibility using dynamic negative airway pressure (CI) [Norton et al.], 1155

**Minimum alveolar concentration**

of intravenous isoflurane lipid emulsion vs. inhaled isoflurane in dogs (LI) [Yang et al.], 482

**Mitochondrial metabolism**

carnitine deficiency, mitochondrial metabolism, and abnormal response to anesthetics (CO) [Weinberg et al.], 1343

**Models and modeling**

- actions of midazolam on excitatory transmission in dorsal horn neurons of adult rat spinal cord (PRA) [Kohno et al.], 338
- age-dependent responses to nerve injury-induced mechanical allodynia (PRA) [Ririe et al.], 344
- arginine vasopressin, terlipressin, or epinephrine for hypotension in rat model of anaphylaxis (LI) [Dewachter et al.], 734
- blood warming during hemofiltration can improve hemodynamics and outcome in ovine septic shock (LI) [Rogiers et al.], 1216
- cerebral blood flow affects dose requirements of intracarotid propofol for electrocerebral silence (LI) [Joshi et al.], 290
- comparative effects of vaporized perfluorohexane and partial liquid ventilation in oleic acid-induced lung injury (LI) [Gama de Abreu et al.], 278
- comparative somatic and visceral antinociception and neurotoxicity of intrathecal bupivacaine, levobupivacaine, and dextropropofol in rats (PRA) [Muguruma et al.], 1249
- differential spinal cord gene expression in rodent models of radicular and neuropathic pain (PRA) [LaCroix-Fralish et al.], 1283
- effect of the physical properties of isoflurane, sevoflurane, and desflurane on pulmonary resistance in a laboratory lung model (LI) [Nykteri et al.], 1202
- effectiveness of isoflurane in inducing delayed preconditioning against myocardial infarction *in vivo* (CO) [Xia et al.], 383
- effects of caffeine, halothane, and 4-chloro-*m*-cresol on skeletal muscle lactate and pyruvate in malignant hyperthermia-susceptible and normal swine (LI) [Bina et al.], 90
- erythromycin induces tolerance against transient global cerebral ischemia in rats (pharmacologic preconditioning) (LI) [Brambrink et al.], 1208
- excitatory and inhibitory actions of isoflurane on cholinergic ascending arousal system of rat (LI) [Dong et al.], 122
- general anesthetic-induced seizures explained by mean-field model of cortical dynamics (SA) [Wilson et al.], 588
- genetic analysis of opioid-induced hyperalgesia in mice (PRA) [Liang et al.], 1054
- increased expression of COX and nitric oxide isoforms, and exaggerated sensitivity to PGE<sub>2</sub>, in rat lumbar spinal cord 3 days after L5-L6 spinal nerve ligation (PRA) [O'Reilly et al.], 328
- increased susceptibility to ventilator-associated lung injury persists after clinical recovery from experimental endotoxemia (LI) [Schreiber et al.], 133
- intravenous anesthetics inhibit capacitative calcium entry into pulmonary venous smooth muscle cells (LI) [Shimizu et al.], 791
- isoflurane increases transendothelial albumin permeability in isolated rat lung (LI) [Hu et al.], 777

isoflurane neuroprotection in rat hippocampal slices decreases with aging (LI) [Zhan et al.], 995

isoflurane produces cardioprotection after ischemia-reperfusion injury in mice (LI) [Tsutsumi et al.], 495

major histocompatibility complex haplotype is associated with postoperative pain in mice (PRA) [Sato-Takeda et al.], 1063

of mice and men and type II errors (CO) [Hartung], 206

minimum alveolar concentration of intravenous isoflurane lipid emulsion *vs.* inhaled isoflurane in dogs (LI) [Yang et al.], 482

monitoring of propofol in expired alveolar gas during artificial ventilation (LI) [Grossherr et al.], 786

neuroprotective effects of propofol in models of cerebral ischemia (LI) [Adembri et al.], 80

opioid-induced hyperalgesia in murine model of postoperative pain (PRA) [Célérier et al.], 546

orexins increase cortical acetylcholine release and EEG activation through orexin-1 receptor in rat basal forebrain during isoflurane anesthesia (LI) [Dong et al.], 1023

parturition in the rat: physiologic pain model (PRA) [Catheline et al.], 1257

patch-clamp analysis of changes in properties of substantia gelatinosa neurons after surgical incision in rat (Symposium) [Kawamata et al.], 432

perineural clonidine reduces mechanical hypersensitivity and cytokine production in nerve injury (PRA) [Romero-Sandoval et al.], 351

preparation and anesthetic properties of propofol microemulsions in rats (LI) [Morey et al.], 1184

propofol-induced activation of protein kinase C isoforms in adult rat ventricular myocytes (LI) [Wickley et al.], 970

protective effects of isoflurane pretreatment in endotoxin-induced lung injury (LI) [Reutershan et al.], 511

ropivacaine decreases inflammation in endotoxin-induced lung injury (LI) [Blumenthal et al.], 961

sugammadex reversal of rocuronium in anesthetized rhesus monkeys (LI) [de Boer et al.], 718

well-being model: drug interaction model for positive and negative effects (LI) [Zanderigo et al.], 742

xenon during cardiopulmonary bypass and cerebral air embolism in rats (LI) [Jungwirth et al.], 770

### Monitoring

critical role of intraoperative transesophageal echocardiography for detection of extrapulmonary thromboemboli during surgical pulmonary embolectomy (CO) [Nowak et al.], 1346

Datex-Ohmeda M-NMT Module: potentially confusing user interface (CO) [Kopman], 1109

Gravenstein, Jaffe, Paulus, *Capnography: Clinical Aspects* (EM) [Roy], 895

injury and liability associated with monitored anesthesia care (CI) [Bhananker et al.], 228

MAC should stand for maximum anesthesia caution, not minimal anesthesiology care (EV) [Hug], 221

practice advisory for intraoperative awareness and brain function monitoring (SA) [ASA Task Force on Intraoperative Awareness], 847

of propofol in expired alveolar gas during artificial ventilation (LI) [Grossherr et al.], 786

time delay of index calculation: Cerebral State, Bispectral, and Narcotrend® indices (LI) [Pilge et al.], 488

transcutaneous CO<sub>2</sub> partial pressure monitoring during apnea testing in brain-dead patients (CI) [Vivien et al.], 701

unusual event with Bispectral Index® Monitoring System (CO) [Hachwa et al.], 619

### Morphine

enhanced NMDA receptor function after chronic exposure to (PRA) [Zhao et al.], 815

### Mortality

anesthesia risk factors not proven by case-control study (CO) [Schmidt], 203

fatal thrombosis after mitral valve replacement for endocarditis: aprotinin and disseminated intravascular coagulation (CO) [Augoustides et al.], 213

impact of anesthesia management characteristics on severe morbidity and (CO) [Bilen-Rosas et al.], 204

perioperative, anesthesia management and (CO) [Avram et al.], 202

perioperative morbidity and mortality? (CO) [Ivester], 203

### Muscle

effects of caffeine, halothane, and 4-chloro-*m*-cresol on skeletal muscle lactate and pyruvate in malignant hyperthermia-susceptible and normal swine (LI) [Bina et al.], 90

gravity, the belly and the diaphragm (CPR) [Froese], 193

preventing acute exacerbation of stiff-person syndrome during surgery (CR) [Gros et al.], 885

### Myocardial infarction

effectiveness of isoflurane in inducing delayed preconditioning against (CO) [Xia et al.], 383

infarct-remodeling myocardium is receptive to protection by isoflurane postconditioning (LLI) [Feng et al.], 1004

postoperative, is a new classification justified? (CO) [Bould], 209

## N

### Narcotrend® Index

time delay of index calculation: Cerebral State, Bispectral, and Narcotrend® indices (LI) [Pilge et al.], 488

### Nasogastric tube

solutions to nasogastric tube-*ProSeal LMA*® conundrum (CO) [Briacombe et al.], 620

### Nausea and vomiting

effect of postoperative experiences on willingness to pay to avoid postoperative pain, nausea, and vomiting (PRA) [van den Bosch et al.], 1033

### Neck

airway management in adults after cervical spine trauma (RA) [Crosby], 1293

atlantoaxial subluxation and intraoperative head positions in rheumatoid arthritis (CI) [Tokunaga et al.], 675

investing layer of cervical fascia of neck may not exist (CO) [Pandit et al.], 1344

preoperative occipitoatlantoaxial mobility assessment in rheumatoid arthritis (CI) [Takenaka et al.], 680

sonographic visualization and ultrasound-guided block of third occipital nerve (PRA) [Eichenberger et al.], 303

### Needlestick injuries

use of safety needles in anesthesia (CO) [Neustein], 1112

### Nerve blocks

efficacy of single-dose, multilevel paravertebral nerve blockade for analgesia after thoracoscopic procedures (PRA) [Hill et al.], 1047

interscalene block superior to general anesthesia: discussion of conclusions regarding these two anesthesia techniques (CO) [Weber et al.], 208

interscalene block superior to general anesthesia (CO) [Reuben], 207

is low-current search a risk factor in peripheral nerve localization? (CO) [Al-Nasser], 1347

perineural infusion of local anesthetics (CCC) [Boezaart], 872

reduction of verbal pain scores after anterior cruciate ligament reconstruction with 2-day continuous femoral nerve block (PRA) [Williams et al.], 315

simultaneous bilateral infraclavicular brachial plexus blocks with low-dose lidocaine using ultrasound guidance (CR) [Sandhu et al.], 199

sonographic visualization and ultrasound-guided block of third occipital nerve (PRA) [Eichenberger et al.], 303

ultralong peripheral nerve block by lidocaine:prilocaine 1:1 mixture in lipid depot formulation (LI) [Söderberg et al.], 110

ultrasound examination and localization of sciatic nerve (PRA) [Chan et al.], 309

ultrasound-guided regional anesthesia (CCC) [Gray], 368

### Nerve injury

age-dependent responses to nerve injury-induced mechanical allodynia (PRA) [Ririe et al.], 344

increased expression of COX and nitric oxide isoforms, and exaggerated sensitivity to PGE<sub>2</sub>, in rat lumbar spinal cord 3 days after L5-L6 spinal nerve ligation (PRA) [O'Reilly et al.], 328

perineural clonidine reduces mechanical hypersensitivity and cytokine production in (PRA) [Romero-Sandoval et al.], 351

shoulder restraints as a potential cause for stretch neuropathies: biomechanical support for the impact of shoulder girdle depression and arm abduction on nerve strain (CO) [Coppiters], 1351

#### Neuromuscular transmission and blockade

activation and inhibition of nicotinic acetylcholine receptors by (LD) [Jonsson et al.], 724  
 activation and inhibition of nicotinic acetylcholine receptors by succinylcholine (LD) [Jonsson et al.], 724  
 Datex-Ohmeda M-NMT Module: potentially confusing user interface (CO) [Kopman], 1109  
 geographic regional differences in rocuronium dose-response relation and time course of action (CI) [Dahaba et al.], 950  
 impact of hypothermia on response to neuromuscular blocking drugs (RA) [Heier et al.], 1070  
 lightwand tracheal intubation with and without muscle relaxation (CI) [Massó et al.], 249  
 rocuronium reversal by sugammadex (CI) [Sorgenfrei et al.], 667  
 succinylcholine: new insights into mechanism of action (EV) [Martyn et al.], 633  
 succinylcholine-induced hyperkalemia in acquired pathologic states (RA) [Martyn et al.], 158  
 sugammadex: revolutionary approach to neuromuscular antagonism (EV) [Kopman], 631  
 sugammadex reversal of rocuronium in anesthetized rhesus monkeys (LD) [de Boer et al.], 718

#### Neuronal cells

patch-clamp analysis of changes in properties of substantia gelatinosa neurons after surgical incision in rat (Symposium) [Kawamata et al.], 432

#### Neuroprotection

erythromycin induces tolerance against transient global cerebral ischemia in rats (pharmacologic preconditioning) (LD) [Brambrink et al.], 1208  
 is xenon really neuroprotective after cardiac arrest? (CO) [Fries et al.], 211  
 isoflurane neuroprotection in rat hippocampal slices decreases with aging (LD) [Zhan et al.], 995  
 of propofol in models of cerebral ischemia (LD) [Adembri et al.], 80

#### Neurosurgery

effects of increasing concentrations of propofol on jugular venous bulb oxygen saturation in neurosurgical patients under normothermic and mildly hypothermic conditions (CI) [Iwata et al.], 2733  
 propofol-induced dyskinesias controlled with dexmedetomidine during deep brain stimulation surgery (CR) [Deogaonkar et al.], 1337  
 Society of Neurosurgical Anesthesia and Critical Care Scientific Meeting (RSM) [McClain], 898

#### Nicotine replacement therapy

perioperative abstinence from cigarettes (RA) [Warner], 356

#### Nitric oxide

increased expression of COX and nitric oxide isoforms, and exaggerated sensitivity to PGE<sub>2</sub>, in rat lumbar spinal cord 3 days after L5-L6 spinal nerve ligation (PRA) [O'Reilly et al.], 328  
 role in opioid-induced hyperalgesia in murine model of postoperative pain (PRA) [Célérier et al.], 546

#### Nitric oxide synthase

propofol decreases myofilament Ca<sup>2+</sup> sensitivity *via* protein kinase C-, nitric oxide synthase-dependent pathway in diabetic cardiomyocytes (LD) [Wickley et al.], 978

#### Nitrous oxide

expansion of gas bubbles by xenon and (LD) [Benavides et al.], 299

## O

#### Obesity

and diabetes, perioperative risk (EV) [Neligan et al.], 398  
 difficult intubation and (CO) [Collins et al.], 617  
 mechanism of benefit of head-up preoxygenation in obese patients (CO) [Wax], 381  
 postoperative morbidity of obese diabetic patients undergoing coronary artery bypass graft surgery (CI) [Pan et al.], 441

#### Obstetric patients

β<sub>2</sub>-adrenoceptor genotype and hypotension after spinal anesthesia for cesarean delivery (SOAP special session) [Smiley et al.], 644  
 Gerard W. Ostheimer "What's New in Obstetric Anesthesia" lecture (SA) [Bucklin], 865  
 heart rate and prophylaxis of hypotension after subarachnoid block for cesarean delivery (SOAP special session) [Hans et al.], 635  
 intracranial hypotension: spontaneous arachnoid rupture in a parturient (CR) [Albertin et al.], 609  
 intracranial subdural hematomas and cerebral herniation after labor epidural with no evidence of dural puncture (CR) [Mashour et al.], 610  
 maternal and neonatal effects of remifentanyl at induction of general anesthesia for cesarean delivery (CI) [Kee et al.], 14  
 obstetric analgesia: the 1982 American College of Obstetricians and Gynecologists standards and the role of Robert E. Johnstone, M.D. (CO) [Johnstone], 1103  
 phenotype of uterine cervical afferents (SOAP special session) [Tong et al.], 651  
 preoperative predictors for postcesarean section pain and analgesic requirement (Symposium) [Pan et al.], 417  
 preoxygenation in head-up *vs.* supine position (CO) [Baraka], 380  
 sildenafil for pulmonary hypertension in (CO) [Lynch et al.], 382  
 Society for Obstetric Anesthesia and Perinatology (RSM), B1 (April) the treatment should not be worse than the disease (CO) [Beilin], 1348

#### Obstructive sleep apnea

practice guidelines for the perioperative management of patients with obstructive sleep apnea (SA) [ASA Task Force of Perioperative Management of Patients with Obstructive Sleep Apnea], 1081

#### Occipitatlantoaxial complex

preoperative mobility assessment in rheumatoid arthritis (CI) [Takenaka et al.], 680

#### Operating room management

the elephant in the operating room (CO) [Metz], 1340  
 is the operating room of the future a viable economic reality? (CO) [Dritz], 1340  
 predicting patient nonappearance for surgery to optimize operating room utilization (EC) [Basson et al.], 826

#### Opioids

basal heat pain thresholds predict opioid analgesia in patients with postherpetic neuralgia (PRA) [Edwards et al.], 1243  
 enhanced NMDA receptor function after chronic morphine (PRA) [Zhao et al.], 815  
 genetic analysis of opioid-induced hyperalgesia in mice (PRA) [Liang et al.], 1054  
 genetic basis of opioid-induced hyperalgesia (EV) [Nackley et al.], 909  
 maternal and neonatal effects of remifentanyl at induction of general anesthesia for cesarean delivery (CI) [Kee et al.], 14  
 mechanism-based pharmacokinetic-pharmacodynamic modeling of the antinociceptive effect of buprenorphine in healthy volunteers (PRA) [Yassen et al.], 1232  
 opioid-induced hyperalgesia in murine model of postoperative pain (PRA) [Célérier et al.], 546  
 opioid-induced hyperalgesia (RA) [Angst et al.], 570  
 use of ketamine to facilitate opioid withdrawal in a child (CO) [Ito et al.], 1113

#### Oral surgery

COX-2 induction after oral surgery does not entirely account for analgesia after selective blockade of COX-2 in perioperative period (PRA) [Fornai et al.], 152

#### Orexins

orexins increase cortical acetylcholine release and EEG activation through orexin-1 receptor in rat basal forebrain during isoflurane anesthesia (LD) [Dong et al.], 1023

#### Orthopedic surgery

impact of postoperative unwashed shed blood retrieved after total knee arthroplasty on endotoxin-stimulated TNF-α release in vitro (CI) [Muñoz et al.], 267  
 reduction of verbal pain scores after anterior cruciate ligament

- reconstruction with 2-day continuous femoral nerve block (PRA) [Williams et al.], 315
- upregulation of PGE<sub>2</sub> and interleukins in CNS and peripheral tissue during and after surgery (Symposium) [Buvanendran et al.], 403 (erratum, 900)
- Oxygenation**
- effects of increasing concentrations of propofol on jugular venous bulb oxygen saturation in neurosurgical patients under normothermic and mildly hypothermic conditions (CI) [Iwata et al.], 2733
- fresh *vs.* aged stored blood to reverse anemia-induced brain oxygenation deficits (CI) [Weiskopf et al.], 911
- hemoglobin M (Milwaukee), pulse oximetry and (CR) [Stucke et al.], 887
- hypercapnia increases subcutaneous and colonic oxygen tension during abdominal surgery (CI) [Fleischmann et al.], 944
- mechanism of benefit of head-up preoxygenation in obese patients (CO) [Wax], 381
- preoxygenation during pregnancy in head-up *vs.* supine position (CO) [Baraka], 380
- preoxygenation in claustrophobic patients (CO) [Erickson et al.], 387
- P**
- Pain, neuropathic**
- basal heat pain thresholds predict opioid analgesia in patients with postherpetic neuralgia (PRA) [Edwards et al.], 1243
- differential spinal cord gene expression in rodent models of radicular and neuropathic pain (PRA) [LaCroix-Fralish et al.], 1283
- effect of ketamine and lidocaine on spontaneous and evoked pain in patients with nerve injury pain (PRA) [Gottrup et al.], 527
- increased expression of COX and nitric oxide isoforms, and exaggerated sensitivity to PGE<sub>2</sub>, in rat lumbar spinal cord 3 days after L5-L6 spinal nerve ligation (PRA) [O'Reilly et al.], 328
- perineural clonidine reduces mechanical hypersensitivity and cytokine production in nerve injury (PRA) [Romero-Sandoval et al.], 351
- Pain, postoperative**
- analgesic treatment after laparoscopic cholecystectomy (RA) [Bisgaard], 835
- COX-2 induction after oral surgery does not entirely account for analgesia after selective blockade of COX-2 in perioperative period (PRA) [Fornai et al.], 152
- developmental differences in spinal COX-1 expression after surgical incision (Symposium) [Ririe et al.], 426
- effect of postoperative experiences on willingness to pay to avoid postoperative pain, nausea, and vomiting (PRA) [van den Bosch et al.], 1033
- multicenter dose-escalation study of analgesic and adverse effects of oral cannabis extract (Cannador) for postoperative pain management (PRA) [Holdcroft et al.], 1040
- opioid-induced hyperalgesia in murine model of (PRA) [C  l  rier et al.], 546
- patch-clamp analysis of changes in properties of substantia gelatinosa neurons after surgical incision in rat (Symposium) [Kawamata et al.], 432
- postoperative hyperalgesia (CCC) [Wilder-Smith et al.], 601
- postoperative modulation of CNS PGE<sub>2</sub> by COX inhibitors after vascular surgery (Symposium) [Reuben et al.], 411
- postsurgical safety of opioid-sparing COX-2 inhibitors (CO) [Babul et al.], 375
- preoperative predictors for postcesarean section pain and analgesic requirement (Symposium) [Pan et al.], 417
- preventing and treating pain after thoracic surgery (CCC) [Gottschalk et al.], 594
- reduction of verbal pain scores after anterior cruciate ligament reconstruction with 2-day continuous femoral nerve block (PRA) [Williams et al.], 315
- safety and efficacy of COX-2 inhibitors parecoxib and valdecoxib after noncardiac surgery (PRA) [Nussmeier et al.], 518
- special issue on plasticity in (EV) [Raja et al.], 397
- upregulation of PGE<sub>2</sub> and interleukins in CNS and peripheral tissue during and after surgery (Symposium) [Buvanendran et al.], 403 (erratum, 900)
- Pain management**
- actions of midazolam on excitatory transmission in dorsal horn neurons of adult rat spinal cord (PRA) [Kohno et al.], 338
- basal heat pain thresholds predict opioid analgesia in patients with postherpetic neuralgia (PRA) [Edwards et al.], 1243
- better methods for meta-analysis available (CO) [Pace], 1350
- efficacy of single-dose, multilevel paravertebral nerve blockade for analgesia after thoracoscopic procedures (PRA) [Hill et al.], 1047
- mechanism-based pharmacokinetic-pharmacodynamic modeling of the antinociceptive effect of buprenorphine in healthy volunteers (PRA) [Yassen et al.], 1232
- multicenter dose-escalation study of analgesic and adverse effects of oral cannabis extract (Cannador) for postoperative pain management (PRA) [Holdcroft et al.], 1040
- preventing and treating pain after thoracic surgery (CCC) [Gottschalk et al.], 594
- thoracic epidural *versus* intravenous patient-controlled analgesia after cardiac surgery (PRA) [Hansdottir et al.], 142
- Pain mechanisms**
- age-dependent responses to nerve injury-induced mechanical allodynia (PRA) [Ririe et al.], 344
- blockade of the complement C5a receptor reduces incisional allodynia, edema, and cytokine expression (PRA) [Clark et al.], 1274
- bupivacaine inhibits spinal extracellular receptor-activated kinase (PRA) [Yanagitate et al.], 805
- effect of ketamine and lidocaine on spontaneous and evoked pain in patients with nerve injury pain (PRA) [Gottrup et al.], 527
- genetic basis of opioid-induced hyperalgesia (EV) [Nackley et al.], 909
- major histocompatibility complex haplotype is associated with postherpetic pain in mice (PRA) [Sato-Takeda et al.], 1063
- opioid-induced hyperalgesia (RA) [Angst et al.], 570
- parturition in the rat: physiologic pain model (PRA) [Catheline et al.], 1257
- patch-clamp analysis of changes in properties of substantia gelatinosa neurons after surgical incision in rat (Symposium) [Kawamata et al.], 432
- phenotype of uterine cervical afferents (SOAP special session) [Tong et al.], 651
- postoperative hyperalgesia (CCC) [Wilder-Smith et al.], 601
- propofol increases presynaptic inhibition of Ia afferents in spinal cord (PRA) [Baars et al.], 798
- Parkinson's disease**
- propofol-induced dyskinesias controlled with dexmedetomidine during deep brain stimulation surgery (CR) [Deogaonkar et al.], 1337
- Patient-controlled analgesia**
- thoracic epidural *versus* intravenous patient-controlled analgesia after cardiac surgery (PRA) [Hansdottir et al.], 142
- Patient positioning**
- atlantoaxial subluxation and intraoperative head positions in rheumatoid arthritis (CI) [Tokunaga et al.], 675
- mechanism of benefit of head-up preoxygenation in obese patients (CO) [Wax], 381
- preoxygenation during pregnancy in head-up *vs.* supine position (CO) [Baraka], 380
- Patient simulators**
- patient simulator performance as adjunct to oral examination for senior anesthesia residents (CI) [Savoldelli et al.], 475
- Pediatric patients**
- determination of endotracheal tube size in perinatal population (CI) [Fayoux et al.], 954
- maternal and neonatal effects of remifentanyl at induction of general anesthesia for cesarean delivery (CI) [Kee et al.], 14
- of mice and men and type II errors (CO) [Hartung], 206
- perinatal diagnosis of malignant hyperthermia susceptibility (CO) [Girard et al.], 1353
- pharmacokinetics of single bolus of propofol in Chinese children (CI) [ShangGuan et al.], 27
- propofol pharmacokinetics and pharmacodynamics for depth of

- sedation in nonventilated infants after major craniofacial surgery (CI) [Peeters et al.], 466
- spectral entropy as measure of hypnosis in (CI) [Klockars et al.], 708
- use of ketamine to facilitate opioid withdrawal in a child (CO) [Ito et al.], 1113
- Perfluorohexane**
- vaporized, compared with partial liquid ventilation in oleic acid-induced lung injury (LD) [Gama de Abreu et al.], 278
- Perioperative risk**
- obesity and diabetes (EV) [Neligan et al.], 398
- postoperative morbidity of obese diabetic patients undergoing coronary artery bypass graft surgery (CI) [Pan et al.], 441
- Pharmacokinetics and pharmacodynamics**
- do general anesthetics add up? (EV) [Hemmings et al.], 1120
- Fee, Bovill, *Pharmacology for Anaesthesiologists* (EM) [Waskell], 1114
- geographic regional differences in rocuronium dose-response relation and time course of action (CI) [Dahaba et al.], 950
- mechanism-based pharmacokinetic-pharmacodynamic modeling of the antinociceptive effect of buprenorphine in healthy volunteers (PRA) [Yassen et al.], 1232
- pharmacokinetics of single bolus of propofol in Chinese children (CI) [ShangGuan et al.], 27
- of propofol for depth of sedation in nonventilated infants after major craniofacial surgery (CI) [Peeters et al.], 466
- succinylcholine: new insights into mechanism of action (EV) [Martyn et al.], 633
- well-being model: drug interaction model for positive and negative effects (LD) [Zanderigo et al.], 742
- Phenylephrine**
- the treatment should not be worse than the disease (CO) [Beilin], 1348
- Plasticity and postoperative pain**
- developmental differences in spinal COX-1 expression after surgical incision (Symposium) [Ririe et al.], 426
- patch-clamp analysis of changes in properties of substantia gelatinosa neurons after surgical incision in rat (Symposium) [Kawamata et al.], 432
- postoperative modulation of CNS PGE<sub>2</sub> by COX inhibitors after vascular surgery (Symposium) [Reuben et al.], 411
- preoperative predictors for postcesarean section pain and analgesic requirement (Symposium) [Pan et al.], 417
- special issue on (EV) [Raja et al.], 397
- upregulation of PGE<sub>2</sub> and interleukins in CNS and peripheral tissue during and after surgery (Symposium) [Buvanendran et al.], 403 (erratum, 900)
- Pneumonia**
- endotracheal tubes: conduit for oral and nasal microbial communities to lungs (EV) [Jacobs et al.], 224
- ventilator-associated pneumonia leading to acute lung injury after trauma (CI) [Stéphan et al.], 235
- Pneumothorax**
- in the intensive care unit (CI) [de Lassence et al.], 5
- Poisoning**
- Brent, Wallace, Burkhart, Phillips, Donovan, *Critical Care Toxicology* (EM) [Deleme], 214
- Postherpetic neuralgia**
- basal heat pain thresholds predict opioid analgesia in patients with postherpetic neuralgia (PRA) [Edwards et al.], 1243
- major histocompatibility complex haplotype is associated with postherpetic pain in mice (PRA) [Sato-Takeda et al.], 1063
- Post-traumatic stress disorder**
- perioperative treatment of patients with history of intraoperative awareness and (CO) [Mashour et al.], 893
- Potassium and potassium channels**
- impact of *in vivo* isoflurane preconditioning on ATP-sensitive potassium channels in rat heart (LD) [Stadnicka et al.], 503
- succinylcholine-induced hyperkalemia in acquired pathologic states (RA) [Martyn et al.], 158
- Practice advisories**
- practice advisory for intraoperative awareness and brain function monitoring (SA) [ASA Task Force on Intraoperative Awareness], 847
- practice advisory for perioperative visual loss associated with spine surgery (SA) [ASA Task Force on Perioperative Blindness], 1319
- practice guidelines for the perioperative management of patients with obstructive sleep apnea (SA) [ASA Task Force of Perioperative Management of Patients with Obstructive Sleep Apnea], 1081
- Preconditioning**
- effectiveness of isoflurane in inducing delayed preconditioning against myocardial infarction *in vivo* (CO) [Xia et al.], 383
- erythromycin induces tolerance against transient global cerebral ischemia in rats (pharmacologic preconditioning) (LD) [Brambrink et al.], 1208
- impact of *in vivo* isoflurane preconditioning on ATP-sensitive potassium channels in rat heart (LD) [Stadnicka et al.], 503
- protective effects of isoflurane pretreatment in endotoxin-induced lung injury (LD) [Reutershan et al.], 511
- Preeclampsia**
- Gerard W. Ostheimer "What's New in Obstetric Anesthesia" lecture (SA) [Bucklin], 865
- Pregnancy. See Obstetric patients**
- Preoxygenation**
- in claustrophobic patients (CO) [Erickson et al.], 387
- head-up, mechanism of benefit in obese patients (CO) [Wax], 381
- during pregnancy in head-up *vs.* supine position (CO) [Baraka], 380
- Prilocaine**
- ultralong peripheral nerve block by lidocaine:prilocaine 1:1 mixture in lipid depot formulation (LD) [Söderberg et al.], 110
- Propofol**
- additive effects of sevoflurane and propofol on  $\gamma$ -aminobutyric acid receptor function (LD) [Sebel et al.], 1176
- cerebral blood flow affects dose requirements of intracarotid propofol for electrocerebral silence (LD) [Joshi et al.], 290
- closed-loop *vs.* manual titration of propofol guided by Bispectral Index (CI) [Liu et al.], 686
- cortical processing of complex auditory stimuli during propofol anesthesia (CI) [Plourde et al.], 448
- differences between midazolam and propofol sedation on upper airway collapsibility using dynamic negative airway pressure (CI) [Norton et al.], 1155
- effect on presynaptic inhibition of Ia afferents in spinal cord (PRA) [Baars et al.], 798
- effects of increasing concentrations of propofol on jugular venous bulb oxygen saturation in neurosurgical patients under normothermic and mildly hypothermic conditions (CI) [Iwata et al.], 2733
- influence of descending thoracic aortic cross clamping on BIS value and plasma propofol concentration (CI) [Kakinohana et al.], 939
- inhibition of NMDA receptor phosphorylation (LD) [Kingston et al.], 763
- interaction of propofol and sevoflurane on loss of consciousness and movement to skin incision during general anesthesia (CI) [Harris et al.], 1170
- monitoring in expired alveolar gas during artificial ventilation (LD) [Grossherr et al.], 786
- pharmacokinetics and pharmacodynamics for depth of sedation in nonventilated infants after major craniofacial surgery (CI) [Peeters et al.], 466
- pharmacokinetics of single bolus of propofol in Chinese children (CI) [ShangGuan et al.], 27
- preparation and anesthetic properties of propofol microemulsions in rats (LD) [Morey et al.], 1184
- propofol decreases myofilament Ca<sup>2+</sup> sensitivity *via* protein kinase C-, nitric oxide synthase-dependent pathway in diabetic cardiomyocytes (LD) [Wickley et al.], 978
- propofol-induced activation of protein kinase C isoforms in adult rat ventricular myocytes (LD) [Wickley et al.], 970
- propofol-induced dyskinesias controlled with dexmedetomidine during deep brain stimulation surgery (CR) [Deogaonkar et al.], 1337
- Prostaglandins**
- increased expression of COX and nitric oxide isoforms, and exaggerated sensitivity to PGE<sub>2</sub>, in rat lumbar spinal cord 3 days after L5-L6 spinal nerve ligation (PRA) [O'Reilly et al.], 328

postoperative modulation of CNS PGE<sub>2</sub> by COX inhibitors after vascular surgery (Symposium) [Reuben et al.], 411  
 upregulation of PGE<sub>2</sub> and interleukins in CNS and peripheral tissue during and after surgery (Symposium) [Buvanendran et al.], 403 (erratum, 900)

**Protein kinase C**

propofol decreases myofilament Ca<sup>2+</sup> sensitivity *via* protein kinase C-, nitric oxide synthase-dependent pathway in diabetic cardiomyocytes (LI) [Wickley et al.], 978  
 propofol-induced activation of protein kinase C isoforms in adult rat ventricular myocytes (LI) [Wickley et al.], 970

**Pruritus**

postoperative (CO) [Mahajan et al.], 385

**Pulmonary hypertension**

in pregnancy, sildenafil for (CO) [Lynch et al.], 382

**Q****QT interval**

droperidol has been reported to cause serious arrhythmias (CO) [Sosis], 386  
 drug-induced prolongation of (CO) [White et al.], 386  
 measurement of (CI) [Charbit et al.], 255  
 mechanisms underlying QT interval-prolonging effects of sevoflurane and its interactions with other QT-prolonging drugs (LI) [Kang et al.], 1015

**R****Radiculopathy**

differential spinal cord gene expression in rodent models of radicular and neuropathic pain (PRA) [LaCroix-Fralish et al.], 1283

**Rapid sequence induction**

plastic single-use and metal reusable laryngoscope blades for orotracheal intubation during (CI) [Amour et al.], 60

**Regional anesthesia and anesthetics**

benefits over general anesthesia for outpatient rotator cuff surgery (CO) [Brown], 207  
 ultrasound-guided regional anesthesia (CCC) [Gray], 368

**Remifentanyl**

EEG approximate entropy changes during infusion of (CI) [Noh et al.], 921  
 maternal and neonatal effects at induction of general anesthesia for cesarean delivery (CI) [Kee et al.], 14

**Respiratory depression**

MAC should stand for maximum anesthesia caution, not minimal anesthesiology care (EV) [Hug], 221

**Review articles**

airway management in adults after cervical spine trauma (RA) [Crosby], 1293  
 analgesic treatment after laparoscopic cholecystectomy (RA) [Bisgaard], 835  
 impact of hypothermia on response to neuromuscular blocking drugs (RA) [Heier et al.], 1070  
 levosimendan, a new inotropic and vasodilator agent (RA) [Toller et al.], 556  
 opioid-induced hyperalgesia (RA) [Angst et al.], 570  
 perioperative abstinence from cigarettes (RA) [Warner], 356  
 succinylcholine-induced hyperkalemia in acquired pathologic states (RA) [Martyn et al.], 158

**Reviews of educational material**

Absalom, Struys, *An Overview of TCI and TIVA* (EM) [Doufas], 895  
 Barash, Perrino, Reeves, Garwood, Sivarajan, *A Practical Approach to Transesophageal Echocardiography on PDA: Powered by Skyscape, Inc., CD-ROM* (EM) [Rehfeldt], 1357  
 Brent, Wallace, Burkhart, Phillips, Donovan, *Critical Care Toxicology* (EM) [Deleme], 214  
 Canton, McGoldrick, *Careers in Anesthesiology: Autobiographical Memoirs Volume VIII. A. A. Spence, Julien F. Biebuyck, Richard J. Kitz, John W. Severinghaus* (EM) [Curry], 389

Euliano, Gravenstein, *Essential Anesthesia: From Science to Practice* (EM) [Long], 1114

Fee, Bovill, *Pharmacology for Anaesthesiologists* (EM) [Waskell], 1114

Fink, Abraham, Vincent, Kochanek, *Textbook of Critical Care, Fifth Edition* (EM) [Suter], 389

Gennari, Adroque, Galla, Madias, *Acid-Base Disorders and Their Treatment* (EM) [Story et al.], 1357

Gravenstein, Jaffe, Paulus, *Capnography: Clinical Aspects* (EM) [Roy], 895

Hunter, Cook, Priebe, Struys, *The Year in Anesthesia and Critical Care* (EM) [Easdown], 621

White, Baldwin, *Legal and Ethical Aspects of Anesthesia, Critical Care and Perioperative Medicine* (EM) [Kumar], 621

White, *Perioperative Drug Manual, 2nd edition* (EM) [Waskell], 214

**Rheumatoid arthritis**

atlantoaxial subluxation and intraoperative head positions in (CI) [Tokunaga et al.], 675

preoperative occipitoatlantoaxial mobility assessment in (CI) [Takemaka et al.], 680

**Rocuronium**

geographic regional differences in dose-response relation and time course of action (CI) [Dahaba et al.], 950

reversal by sugammadex (CI) [Sorgenfrei et al.], 667

sugammadex reversal of, in anesthetized rhesus monkeys (LI) [de Boer et al.], 718

**Ropivacaine**

inflammation in endotoxin-induced lung injury decreased by (LI) [Blumenthal et al.], 961

**Rotator cuff surgery**

benefits of regional anesthesia over general anesthesia for outpatient surgery (CO) [Brown], 207

interscalene block superior to general anesthesia: discussion of conclusions regarding these two anesthesia techniques (CO) [Weber et al.], 208

interscalene block superior to general anesthesia (CO) [Reuben], 207

**Ryanodine receptors**

characterization of ryanodine receptor-mediated calcium release in human B cells (LI) [McKinney et al.], 1191

malignant hyperthermia in Japan: mutation screening of ryanodine receptor type 1 gene coding region (CI) [Ibarra et al.], 1146

**S****Safety issues**

drug labels should evolve with medical knowledge (CO) [Baumgarten], 1107

injury and liability associated with monitored anesthesia care (CI) [Bhananker et al.], 228

is low-current search a risk factor in peripheral nerve localization? (CO) [Al-Nasser], 1347

labeling (package insert): meaning by the Food and Drug Administration of not recommended, not indicated, and off-label use (CO) [Moore], 1107

MAC should stand for maximum anesthesia caution, not minimal anesthesiology care (EV) [Hug], 221

package inserts are a must read for anesthesiologists (CO) [Sosis], 1106

postsurgical safety of opioid-sparing COX-2 inhibitors (CO) [Babul et al.], 375

safe, low-technology anesthesia system for medical missions to remote locations (CO) [Khambatta et al.], 1354

safety and efficacy of COX-2 inhibitors parecoxib and valdecoxib after noncardiac surgery (PRA) [Nussmeier et al.], 518

use of safety needles in anesthesia (CO) [Neustein], 1112

xenon delivery while on cardiopulmonary bypass for coronary artery bypass graft surgery (CI) [Lockwood et al.], 458

**S100B protein**

plasma levels after subarachnoid aneurysmal hemorrhage, prognostic value of (CI) [Weiss et al.], 658

**Sciatic nerve**

perineural clonidine reduces mechanical hypersensitivity and cytokine production in nerve injury (PRA) [Romero-Sandoval et al.], 351

ultrasound examination and localization of (PRA) [Chan et al.], 309

**Sedation**

differences between midazolam and propofol sedation on upper airway collapsibility using dynamic negative airway pressure (CI) [Norton et al.], 1155

propofol pharmacokinetics and pharmacodynamics for depth of sedation in nonventilated infants after major craniofacial surgery (CI) [Peeters et al.], 466

**Seizures**

general anesthetic-induced, explained by mean-field model of cortical dynamics (SA) [Wilson et al.], 588

**Septic shock**

blood warming during hemofiltration can improve hemodynamics and outcome in ovine septic shock (LI) [Rogiers et al.], 1216

**Sevoflurane**

additive effects of sevoflurane and propofol on  $\gamma$ -aminobutyric acid receptor function (LI) [Sebel et al.], 1176

effect of the physical properties of isoflurane, sevoflurane, and desflurane on pulmonary resistance in a laboratory lung model (LI) [Nykteri et al.], 1202

interaction of propofol and sevoflurane on loss of consciousness and movement to skin incision during general anesthesia (CI) [Harris et al.], 1170

mechanisms underlying QT interval-prolonging effects of sevoflurane and its interactions with other QT-prolonging drugs (LI) [Kang et al.], 1015

**Shock**

arginine vasopressin, terlipressin, or epinephrine for hypotension in rat model of anaphylaxis (LI) [Dewachter et al.], 734

blood warming during hemofiltration can improve hemodynamics and outcome in ovine septic shock (LI) [Rogiers et al.], 1216

**Shoulder surgery**

benefits of regional anesthesia over general anesthesia for outpatient rotator cuff surgery (CO) [Brown], 207

interscalene block superior to general anesthesia: discussion of conclusions regarding these two anesthesia techniques (CO) [Weber et al.], 208

interscalene block superior to general anesthesia (CO) [Reuben], 207

**Sildenafil**

for pulmonary hypertension in pregnancy (CO) [Lynch et al.], 382

**Smoking**

perioperative abstinence from cigarettes (RA) [Warner], 356

**Smooth muscle, vascular**

intravenous anesthetics inhibit capacitative calcium entry into pulmonary venous smooth muscle cells (LI) [Shimizu et al.], 791

**Society for Obstetric Anesthesia and Perinatology (SOAP)**

abstracts of papers presented at 38th Annual Meeting, B1 (April)  
 $\beta_2$ -adrenoceptor genotype and hypotension after spinal anesthesia for cesarean delivery (SOAP special session) [Smiley et al.], 644

heart rate and prophylaxis of hypotension after subarachnoid block for cesarean delivery (SOAP special session) [Hanss et al.], 635

phenotype of uterine cervical afferents (SOAP special session) [Tong et al.], 651

**Special articles**

anesthesiology physician scientists in academic medicine (SA) [Schwinn et al.], 170

the *Anlet* (SA) [Wright et al.], 179

Ansel Marion Caine, M.D. (SA) [Broussard et al.], 1329

general anesthetic-induced seizures explained by mean-field model of cortical dynamics (SA) [Wilson et al.], 588

Gerard W. Ostheimer "What's New in Obstetric Anesthesia" lecture (SA) [Bucklin], 865

practice advisory for intraoperative awareness and brain function monitoring (SA) [ASA Task Force on Intraoperative Awareness], 847

practice advisory for perioperative visual loss associated with spine

surgery (SA) [ASA Task Force on Perioperative Blindness], 1319

practice guidelines for the perioperative management of patients with obstructive sleep apnea (SA) [ASA Task Force of Perioperative Management of Patients with Obstructive Sleep Apnea], 1081

who better than anesthesiologists? 44th Rovenstine Lecture (SA) [Warner], 1094

**Spectral entropy**

as measure of hypnosis in children (CI) [Klockars et al.], 708

**Spinal anesthesia and analgesia**

actions of midazolam on excitatory transmission in dorsal horn neurons of adult rat spinal cord (PRA) [Kohno et al.], 338

$\beta_2$ -adrenoceptor genotype and hypotension after spinal anesthesia for cesarean delivery (SOAP special session) [Smiley et al.], 644

cerebral rebleeding by spinal anesthesia in patient with undiagnosed chronic subdural hematoma (CR) [Zeidan et al.], 613

comparative somatic and visceral antinociception and neurotoxicity of intrathecal bupivacaine, levobupivacaine, and dextrobupivacaine in rats (PRA) [Muguruma et al.], 1249

heart rate variability predicts severe hypotension after (PRA) [Hanss et al.], 537

the treatment should not be worse than the disease (CO) [Beilin], 1348

**Spinal cord function and disease**

actions of midazolam on excitatory transmission in dorsal horn neurons of adult rat spinal cord (PRA) [Kohno et al.], 338

bupivacaine inhibits spinal extracellular receptor-activated kinase (PRA) [Yanagidate et al.], 805

developmental differences in spinal COX-1 expression after surgical incision (Symposium) [Ririe et al.], 426

differential spinal cord gene expression in rodent models of radicular and neuropathic pain (PRA) [LaCroix-Fralish et al.], 1283

increased expression of COX and nitric oxide isoforms, and exaggerated sensitivity to PGE<sub>2</sub>, in rat lumbar spinal cord 3 days after L5-L6 spinal nerve ligation (PRA) [O'Reilly et al.], 328

propofol increases presynaptic inhibition of Ia afferents in spinal cord (PRA) [Baars et al.], 798

**Statistics**

better methods for meta-analysis available (CO) [Pace], 1350

lies, damn lies, and statistics (CO) [Robertson], 202

of mice and men and type II errors (CO) [Hartung], 206

statistical prediction of type of gastric aspiration lung injury based on early cytokine/chemokine profiles (LI) [Hutson et al.], 73

**Stiff-person syndrome**

preventing acute exacerbation during surgery (CR) [Gros et al.], 885

**Subarachnoid aneurysmal hemorrhage**

changing outcome from (EV) [Warner et al.], 629

prognostic value of plasma S100B protein levels after (CI) [Weiss et al.], 658

**Subdural hematoma**

intracranial, and cerebral herniation after labor epidural with no evidence of dural puncture (CR) [Mashour et al.], 610

undiagnosed chronic, cerebral rebleeding by spinal anesthesia in patient with (CR) [Zeidan et al.], 613

**Succinylcholine**

activation and inhibition of nicotinic acetylcholine receptors by (LI) [Jonsson et al.], 724

hyperkalemia induced by, in acquired pathologic states (RA) [Martyn et al.], 158

new insights into mechanism of action (EV) [Martyn et al.], 633

**Suctioning**

open and closed-circuit endotracheal suctioning in acute lung injury (CI) [Lasocki et al.], 39

**Sugammadex**

reversal of rocuronium in anesthetized rhesus monkeys (LI) [de Boer et al.], 718

revolutionary approach to neuromuscular antagonism (EV) [Kopman], 631

rocuronium reversal by (CI) [Sorgenfrei et al.], 667



## T

**Temperature and thermoregulation**

- effects of increasing concentrations of propofol on jugular venous bulb oxygen saturation in neurosurgical patients under normothermic and mildly hypothermic conditions (CI) [Iwata et al.], 2733
- fructose administration increases intraoperative core temperature by augmenting both metabolic rate and the vasoconstriction threshold (CI) [Mizobe et al.], 1124
- impact of hypothermia on response to neuromuscular blocking drugs (RA) [Heier et al.], 1070
- setting the “furnace” during anesthesia (EV) [Lindahl], 1119

**Terlipressin**

- compared with arginine vasopressin or epinephrine for hypotension in rat model of anaphylaxis (LI) [Dewachter et al.], 734

**Thoracic surgery. See also Cardiovascular surgery**

- devices for lung isolation used by anesthesiologists with limited thoracic experience (CI) [Campos et al.], 261
- influence of descending thoracic aortic cross clamping on BIS value and plasma propofol concentration (CI) [Kakinohana et al.], 939
- preventing and treating pain after (CCC) [Gottschalk et al.], 594

**Thoracoscopy**

- efficacy of single-dose, multilevel paravertebral nerve blockade for analgesia after thoracoscopic procedures (PRA) [Hill et al.], 1047

**Thromboembolic disorders**

- critical role of intraoperative transesophageal echocardiography for detection of extrapulmonary thromboemboli during surgical pulmonary embolectomy (CO) [Nowak et al.], 1346
- deep vein thrombosis after recombinant Factor VIIa infusion for postoperative bleeding (CO) [Pépión et al.], 892
- fatal thrombosis after mitral valve replacement for endocarditis: aprotinin and disseminated intravascular coagulation (CO) [Augoustides et al.], 213
- safety and efficacy of COX-2 inhibitors parecoxib and valdecoxib after noncardiac surgery (PRA) [Nussmeier et al.], 518

**Toxicology**

- Brent, Wallace, Burkhart, Phillips, Donovan, *Critical Care Toxicology* (EM) [Deleme], 214

**Trauma**

- airway management in adults after cervical spine trauma (RA) [Crosby], 1293
- ventilator-associated pneumonia leading to acute lung injury after (CI) [Stéphan et al.], 235

## U

**Ultrasonography**

- sonographic visualization and ultrasound-guided block of third occipital nerve (PRA) [Eichenberger et al.], 303
- ultrasound examination and localization of sciatic nerve (PRA) [Chan et al.], 309
- ultrasound-guided regional anesthesia (CCC) [Gray], 368

**Uterine cervical afferents**

- phenotype of (SOAP special session) [Tong et al.], 651

## V

**Vaporizers**

- copper kettle revisited (CPR) [Morris], 881
- vaporizer-selection malfunction in Dräger Narkomed 2C machine (CO) [Kee et al.], 890

**Vascular surgery. See also Cardiovascular surgery**

- postoperative modulation of CNS PGE<sub>2</sub> by COX inhibitors after (Symposium) [Reuben et al.], 411

**Vasculature**

- contrasting effects of colloid and crystalloid resuscitation fluids on cardiac vascular permeability (LI) [Jacob et al.], 1223
- influence of descending thoracic aortic cross clamping on BIS value and plasma propofol concentration (CI) [Kakinohana et al.], 939
- isoflurane increases transendothelial albumin permeability in isolated rat lung (LI) [Hu et al.], 777

**Vaseline oil intoxication**

- exogenous lipid pneumonia: steroid therapy and lung lavage with an emulsifier (CR) [Russo et al.], 197

**Vasodilation**

- levosimendan, a new inotropic and vasodilator agent (RA) [Toller et al.], 556

**Ventilation**

- complications of different ventilation strategies in endoscopic laryngeal surgery (CI) [Jaquet et al.], 52
- new equal area method to calculate physiologic, anatomical, and alveolar dead spaces (CI) [Tang et al.], 696
- transcutaneous CO<sub>2</sub> partial pressure monitoring during apnea testing in brain-dead patients (CI) [Vivien et al.], 701

**Ventilator-associated pneumonia**

- endotracheal tubes: conduit for oral and nasal microbial communities to lungs (EV) [Jacobs et al.], 224
- leading to acute lung injury after trauma (CI) [Stéphan et al.], 235

**Visual loss**

- practice advisory for perioperative visual loss associated with spine surgery (SA) [ASA Task Force on Perioperative Blindness], 1319

## X

**Xenon**

- during cardiopulmonary bypass and cerebral air embolism in rats (LI) [Jungwirth et al.], 770
- expansion of gas bubbles by nitrous oxide and (LI) [Benavides et al.], 299
- is it really neuroprotective after cardiac arrest? (CO) [Fries et al.], 211
- safety of xenon delivery while on cardiopulmonary bypass for coronary artery bypass graft surgery (CI) [Lockwood et al.], 458
